# Supplementary material for: Protocol for a multicentre longitudinal mixed-methods study: feeding and survivorship outcomes in previously healthy young paediatric Intensive care survivors (the PIES Study)
Source: PubMed Central journal article supplement — BMJ Open. 2020 Dec 3;10(12):e041234. doi: 10.1136/bmjopen-2020-041234 (PMC7716671; doi:10.1136/bmjopen-2020-041234), 2020-12-03
Supplement: bmjopen-2020-041234.draft_revisions.pdf [file bmjopen-2020-041234.draft_revisions.pdf]

# BMJ Open

BMJ Open is committed to open peer review. As part of this commitment we make the peer review history of every article we publish publicly available.

When an article is published we post the peer reviewers' comments and the authors' responses online. We also post the versions of the paper that were used during peer review. These are the versions that the peer review comments apply to.

The versions of the paper that follow are the versions that were submitted during the peer review process. They are not the versions of record or the final published versions. They should not be cited or distributed as the published version of this manuscript.

BMJ Open is an open access journal and the full, final, typeset and author-corrected version of record of the manuscript is available on our site with no access controls, subscription charges or pay-per-view fees (<http://bmjopen.bmj.com>).

If you have any questions on BMJ Open's open peer review process please email [info.bmjopen@bmj.com](mailto:info.bmjopen@bmj.com)

# BMJ Open

**Protocol for a multicentre longitudinal mixed methods study: Feeding and survivorship outcomes in previously healthy young Paediatric Intensive Care Survivors – The PIES study**

|                               |                                                                                                                                                                                                                                                                                                                   |
|-------------------------------|-------------------------------------------------------------------------------------------------------------------------------------------------------------------------------------------------------------------------------------------------------------------------------------------------------------------|
| Journal:                      | <i>BMJ Open</i>                                                                                                                                                                                                                                                                                                   |
| Manuscript ID                 | bmjopen-2020-041234                                                                                                                                                                                                                                                                                               |
| Article Type:                 | Protocol                                                                                                                                                                                                                                                                                                          |
| Date Submitted by the Author: | 03-Jun-2020                                                                                                                                                                                                                                                                                                       |
| Complete List of Authors:     | Morton, Kathryn; University Hospital Southampton NHS Foundation Trust, PICU; University of Southampton, School of Health Sciences Darlington, Anne-Sophie; University of Southampton, School of Health Sciences<br>Marino, LV; University Hospital Southampton NHS Foundation Trust, Department of Dietetics/SLT, |
| Keywords:                     | NUTRITION & DIETETICS, Paediatric intensive & critical care < ANAESTHETICS, PAEDIATRICS                                                                                                                                                                                                                           |
|                               |                                                                                                                                                                                                                                                                                                                   |

SCHOLARONE™  
Manuscripts

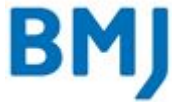

I, the Submitting Author has the right to grant and does grant on behalf of all authors of the Work (as defined in the below author licence), an exclusive licence and/or a non-exclusive licence for contributions from authors who are: i) UK Crown employees; ii) where BMJ has agreed a CC-BY licence shall apply, and/or iii) in accordance with the terms applicable for US Federal Government officers or employees acting as part of their official duties; on a worldwide, perpetual, irrevocable, royalty-free basis to BMJ Publishing Group Ltd ("BMJ") its licensees and where the relevant Journal is co-owned by BMJ to the co-owners of the Journal, to publish the Work in this journal and any other BMJ products and to exploit all rights, as set out in our [licence](#).

The Submitting Author accepts and understands that any supply made under these terms is made by BMJ to the Submitting Author unless you are acting as an employee on behalf of your employer or a postgraduate student of an affiliated institution which is paying any applicable article publishing charge ("APC") for Open Access articles. Where the Submitting Author wishes to make the Work available on an Open Access basis (and intends to pay the relevant APC), the terms of reuse of such Open Access shall be governed by a Creative Commons licence – details of these licences and which [Creative Commons](#) licence will apply to this Work are set out in our licence referred to above.

Other than as permitted in any relevant BMJ Author's Self Archiving Policies, I confirm this Work has not been accepted for publication elsewhere, is not being considered for publication elsewhere and does not duplicate material already published. I confirm all authors consent to publication of this Work and authorise the granting of this licence.

1 **Title:** Protocol for a multicentre longitudinal mixed methods study: Feeding and survivorship  
2 outcomes in previously healthy young Paediatric Intensive Care Survivors – The PIES study  
3  
4  
5  
6  
7  
8  
9  
10

11 **Authors:** Morton, K<sup>1,2</sup>, Darlington ASD<sup>2</sup>, Marino LV<sup>3,4</sup>  
12

13 **Affiliations:**  
14

15 Paediatric Intensive Care Unit, Southampton Children's Hospital<sup>1</sup>, School of Health Sciences,  
16 University of Southampton<sup>2</sup>, Department of Dietetics and Speech & Language Therapy,  
17 University Hospital Southampton NHS Foundation Trust<sup>3</sup>, NIHR Biomedical Research Centre  
18 Southampton, University Hospital Southampton NHS Foundation Trust<sup>4</sup>, United Kingdom.  
19  
20  
21  
22  
23  
24

25 **Author contact details:**  
26

27 **Kathryn Morton;** Sister and Clinical Doctoral Research Fellow, Paediatric Intensive Care Unit,  
28 University Hospital Southampton NHS Foundation Trust, Southampton, UK S016 6YD Tel: + 44  
29 (0) 2381 206972 Email: [Kathryn.morton@uhs.nhs.uk](mailto:Kathryn.morton@uhs.nhs.uk)  
30  
31  
32

33 **Anne-Sophie Darlington;** Professor of Child and Family Psychological Health, School of Health  
34 Sciences, University of Southampton, University Road, Southampton, SO17 1BJ. Email:  
35 [a.darlington@soton.ac.uk](mailto:a.darlington@soton.ac.uk)  
36  
37  
38  
39

40 **Luise Marino;** (PhD) Clinical Academic Paediatric Dietitian, Southampton Children's Hospital,  
41 University Hospital Southampton NHS Foundation Trust, Tremona Road, Southampton, SO16  
42 6YD. Email: [luise.marino@uhs.nhs.uk](mailto:luise.marino@uhs.nhs.uk)  
43  
44  
45  
46  
47  
48

49 **Keywords:** feeding difficulties, children, critical illness, survivors  
50  
51  
52  
53  
54  
55  
56  
57  
58  
59  
60

1  
2  
3 24 **Corresponding author:** Kathryn Morton; Paediatric Intensive Care Unit, University Hospital  
4  
5 25 Southampton NHS Foundation Trust, Southampton, UK S016 6YD Tel: + 44 (0) 2381 206972  
6  
7 26 Email: [Kathryn.morton@uhs.nhs.uk](mailto:Kathryn.morton@uhs.nhs.uk)  
8  
9

10 27  
11  
12 28 **Abstract**

13  
14 29 **Introduction**

15  
16 30 An admission to Paediatric Intensive Care (PICU) is associated with multiple physical and  
17  
18 31 environmental stressors, often involving many negative and painful oral experiences. Evidence  
19  
20 32 from children with complex medical conditions suggest that feeding difficulties post-PICU stay  
21  
22 33 are common, causing significant parental anxiety. Adult intensive care (ICU) survivor studies  
23  
24 34 suggest feeding issues lasting up to 3 months post discharge from ICU. There is, however, a  
25  
26 35 paucity of evidence regarding feeding outcomes for previously healthy children following a PICU  
27  
28 36 admission and whether painful oral experiences during an admission contribute to feeding  
29  
30 37 difficulties post-discharge, negatively impacting on parental/caregiver anxiety.  
31  
32  
33

34 38 **Methods and analysis**

35  
36 39 This longitudinal concurrent mixed method study will explore the impact of feeding  
37  
38 40 difficulties, identifying any clinical risk factors during the first 6 months of PICU-discharge in  
39  
40 41 previously healthy young children ( $\leq 4$  years). Parents/caregivers of children will be asked to  
41  
42 42 complete questionnaires relating to; feeding difficulties, parental/caregiver stress, child and  
43  
44 43 parental/caregivers feeding behaviours, at the point of PICU-discharge, 1, 3 and 6 months post-  
45  
46 44 discharge. Parents/caregivers will be invited to participate in qualitative semi-structured  
47  
48 45 interviews at 3 and 6 months post-PICU-discharge exploring parental/caregiver experiences of  
49  
50 46 feeding their child after PICU. Statistical analysis of the survey data will consist of descriptive  
51  
52  
53  
54  
55  
56  
57  
58  
59  
60

1  
2  
3 47 and inferential statistics, plus qualitative analysis of any free text comments using thematic  
4  
5 48 analysis.  
6

### 7 49 **Ethics and dissemination**

8  
9  
10 50 This study will provide an insight and increase our understanding of the prevalence of  
11  
12 51 feeding difficulties in previously healthy children admitted to PICU and parental/caregiver  
13  
14 52 experiences. Multiple methods will be used to ensure that the findings are effectively  
15  
16 53 disseminated to service users, clinicians, policy and academic audiences. The study has full  
17  
18 54 ethical approval from the National Health Service Research Ethics Committee (Ref: 20/YH/0160)  
19  
20  
21 55 and full governance clearance.  
22  
23  
24 56

### 25 57 **Article summary**

#### 26 58 27 59 **Strengths and limitations of this study**

- 28  
29  
30 60 • A mixed methods design will provide new insights and a greater understanding into the  
31  
32 61 prevalence and impact of feeding issues in previously healthy young children who  
33  
34 62 survive PICU.  
35  
36  
37 63 • Qualitative data collection methods will generate rich data progressing our  
38  
39 64 understanding of this phenomenon.  
40  
41 65 • The longitudinal study design will allow us to explore the feeding survivorship journey  
42  
43 66 experienced by families of children who have survived critical illness.  
44  
45  
46 67 • The longitudinal study design may also however, have the potential for high attrition  
47  
48 68 which may affect data at six months.  
49  
50  
51 69  
52  
53 70  
54  
55 71

## 72 Introduction

73 Paediatric Intensive Care units (PICU) are busier, with admissions increasing by 15% over  
74 the last decade,(1, 2). Approximately 70% of the children are admitted due to emergency  
75 unplanned admissions,(2) causing a period of distress and crisis for families,(3). In developed  
76 countries, advances in medical care and technology mean that over 96% of PICU patients are  
77 discharged alive,(4). In recognition of this, the focus of critical care is changing to improving  
78 survivorship with a view to optimise physical, social, emotional, cognitive and functional  
79 outcomes for children and their families,(5).

80 However, up until now, there has been little focus on the impact an admission to  
81 intensive care (ICU) may have, on feeding and ability to self-feed following discharge. As is  
82 evident from adult ICU survivors, the pain and trauma of multiple oral procedures have been  
83 linked to dysphagia and other sensory feeding difficulties ,(6-10) along with difficulties in self-  
84 feeding, reduced appetite, altered taste and food preferences lasting up to three months post  
85 ICU discharge,(10, 11). Despite most PICUs in the United Kingdom (UK) incorporating early  
86 nutrition support via a nasogastric tube (NGT) within 12 – 24 hours of admission and continued  
87 for the duration of the admission,(12) the majority of children are unable to eat or drink orally  
88 throughout their PICU stay,(13). During their admission, children are exposed to multiple  
89 physical and environmental stressors, often involving up to 89 painful oral experiences,  
90 including the use of endotracheal tubes (ETT), nasogastric tube (NGT) insertion and frequent  
91 oral suctioning,(14).

92 Feeding is a complex process involving not only the physical aspect of oral feeding  
93 ability, but also the social aspect encompassing parental - child interactions,(15). Feeding  
94 difficulties are common among young children born prematurely or those with complex medical  
95 needs e.g. congenital heart disease (CHD). Associated risk factors include duration of intubation

1  
2  
3 96 with a ETT and mechanical ventilation, multiple oral interventions affecting oral motor skills,  
4  
5 97 type of cardiac surgery with added risks associated with use of cardiopulmonary bypass and  
6  
7 98 post-op chest open, prolonging mechanical ventilation,(16-20). The use of NGT's in young  
8  
9 99 children with complex medical needs have been reported to negatively impact developmental  
10  
11 100 milestone achievement with regards to establishing oral intake,(21-25). They may, as a result,  
12  
13 101 cause altered oral sensory issues, difficulties in swallowing food, failure in feeding skill  
14  
15 102 progression with regards to tastes and textures, and present as food refusal in some,(16, 22, 25,  
16  
17 103 26) causing parental distress around feeding and mealtimes,(27-29).

20  
21 104 Despite a plethora of literature and research, there is no universally accepted definition  
22  
23 105 of a paediatric feeding difficulty, (30) . Historically, feeding disorders have been defined in the  
24  
25 106 *Diagnostic and Statistical Manual of Mental Disorders, 5<sup>th</sup> Edition*, (30)and in the *International*  
26  
27 107 *Statistical Classification of Diseases and Related Health Problems, 10<sup>th</sup> Revision*, (30). Although  
28  
29 108 these definitions incorporate nutritional complications found in some medical conditions and  
30  
31 109 recognise oral feeding abilities, they fail to identify the multiple physical, non-organic and  
32  
33 110 psycho-social factors,(31). Feeding difficulties as described by Kerzner and Levine, (28, 29, 32) go  
34  
35 111 beyond diagnostic classifications and include food refusals; disruptive, stressful and prolonged  
36  
37 112 mealtimes; lack of inappropriate self-feeding; failure to advance textures; vomiting and  
38  
39 113 diarrhoea; gagging (and anticipatory gagging); and inappropriate nocturnal feeding, (29, 32).  
40  
41 114 Furthermore, they recognise the importance of the impact that parental-child relationships and  
42  
43 115 interactions with peers has on childhood feeding behaviours. Parental behaviours and feeding  
44  
45 116 styles can directly influence perceived and actual feeding difficulties of young children,(25, 27).  
46  
47 117 Parents play a pivotal role in shaping children's early feeding experiences, providing the physical  
48  
49 118 foods, as well as the social interactions and model eating behaviours,(15).



1  
2  
3 119 The consequence an admission to PICU may impact the acquisition of normal feeding  
4  
5 120 and eating skills of young children and normal parent-child relationships around mealtimes. The  
6  
7 121 implications of this post-PICU-discharge for young children and their families is not known.  
8  
9

## 10 122 **Methods and analysis**

### 11 12 123 **Study aims**

13  
14 124 The PIES study (Feeding and survivorship outcomes in previously healthy young  
15  
16 125 Paediatric Intensive Care Survivors) has six specific objectives:

- 17  
18  
19 126 1. To characterise and measure the prevalence of feeding difficulties in previously healthy  
20  
21 127 children ( $\leq 4$  years) who survive critical illness during the first 6 months after PICU  
22  
23 128 discharge;
- 24  
25 129 2. To identify clinical predictors for the development of feeding difficulties in previously  
26  
27 130 healthy young children ( $\leq 4$  years) who survive critical illness;
- 28  
29 131 3. To identify parental/caregiver feeding styles for previously healthy young children ( $\leq 4$   
30  
31 132 years) who survive critical illness;
- 32  
33 133 4. To measure parental stress in parents/caregivers of previously healthy young children ( $\leq 4$   
34  
35 134 years) who survive critical illness;
- 36  
37 135 5. To identify behaviours of previously healthy young children ( $\leq 4$  years) who survive  
38  
39 136 critical illness;
- 40  
41 137 6. To develop an in-depth understanding of how parents/caregivers of previously healthy  
42  
43 138 young children ( $\leq 4$  years old) who survive critical illness construct, experience and make  
44  
45 139 sense of their survivorship journey from PICU admission, specifically looking at feeding  
46  
47 140 experiences and parental-child relationships.

### 48 49 50 51 52 141 **Study design**

1  
2  
3 142 This multicenter longitudinal mixed method study has concurrent quantitative and  
4  
5 143 qualitative components. Parents/caregivers of children will be asked to complete questionnaires  
6  
7 144 considering aspects relating to; feeding difficulties, parental/caregiver stress, child and  
8  
9 145 parental/caregivers feeding behaviours at the point of PICU-discharge and at 1, 3 and 6 months  
10  
11 146 post-discharge. Parents/caregivers will also be invited to participate in qualitative semi-  
12  
13 147 structured interviews at 3 and 6 months post-PICU-discharge which will explore  
14  
15 148 parental/caregiver experiences of feeding their child post-PICU. See figure 1 for schematic  
16  
17 149 overview of the study design.

### 21 150 **Quantitative study**

22  
23 151 Data about the PICU admission of each child participant will be recorded onto an ALEA  
24  
25 152 electronic Case Report Form (eCRF; <https://www.aleaclinical.eu/>), a secure password  
26  
27 153 protected, web-based eCRF system. Data will include: length of PICU stay; length of intubation;  
28  
29 154 length of mechanical invasive ventilation; number of (re) intubations; type of ETT (oral or nasal);  
30  
31 155 length of non-invasive ventilation; inotrope requirement; mode of feeding during PICU  
32  
33 156 admission; time from extubation to commence oral feeding; mode of feeding at PICU discharge;  
34  
35 157 and evidence of gastric intolerance. Data will also be collected from each child's  
36  
37 158 parent/caregiver prospectively over the first 6- months post-PICU, in a follow-up survey.

### 42 159 **Study Measures**

43  
44  
45 160 The outcome measures for the longitudinal follow-up survey have been selected based  
46  
47 161 on their validity, reliability, use in previous paediatric populations and ease of use. Pre-existing  
48  
49 162 validated questionnaires will be used to measure feeding difficulty assessment, parental stress,  
50  
51 163 parental feeding styles and child behaviour. To obtain longitudinal outcome data and potentially  
52  
53 164 identify acute and/or chronic feeding difficulties, data from the questionnaires will be collected  
54  
55  
56  
57  
58  
59

1  
2  
3 165 at four-time points: at PICU discharge (retrospective data), 1, 3 and 6 months after PICU  
4  
5 166 discharge. The outcomes measures and time points are outlined in Table 1. The questionnaires  
6  
7 167 have also been selected according to age of the child participant, in addition to tested  
8  
9  
10 168 psychometric properties.

11  
12  
13 169 Feeding difficulty assessment measures:

- 14  
15  
16 170 • Infant feeding questionnaire,(33) (7 items; up to 9 month old babies)  
17  
18 171 • Behavioral Pediatric Feeding Assessment Scale,(34) (35 items; 9 months old to 7 years).

19  
20  
21 172 Parental stress measure:

- 22  
23  
24 173 • Parental Stress Scale,(35) (18 items).

25  
26  
27 174 Parental feeding style measures:

- 28  
29  
30 175 • Infant feeding questionnaire,(36) (25 items; up to 2 years)  
31  
32 176 • Child feeding questionnaire,(37) (28 items; from 2 years onwards).

33  
34  
35 177 Child behaviour measures:

- 36  
37  
38 178 • Infant behaviour questionnaire – very short version,(38) (36 items; up to 12 months)  
39  
40 179 • Child behaviour questionnaire – very short version, (39) (35 items; from 1 year).

41  
42  
43 180 **Table 1: Data collection measures and time points**

44  
45

| Timepoint             | Baseline<br>(retrospective<br>data) | 1 month<br>(after<br>PICU<br>discharge) | 3 months<br>(after PICU<br>discharge) | 6 months<br>(after PICU<br>discharge) |
|-----------------------|-------------------------------------|-----------------------------------------|---------------------------------------|---------------------------------------|
| Enrolment:            |                                     |                                         |                                       |                                       |
| Eligibility screening | <b>X</b>                            |                                         |                                       |                                       |

46  
47  
48  
49  
50  
51  
52  
53  
54  
55  
56  
57  
58  
59  
60

|                                                                                            |          |          |          |          |
|--------------------------------------------------------------------------------------------|----------|----------|----------|----------|
| (daily)                                                                                    |          |          |          |          |
| Recruitment                                                                                | <b>X</b> |          |          |          |
| Assessments:                                                                               |          |          |          |          |
| Demographic information                                                                    | <b>X</b> |          |          |          |
| Routinely collected clinical PICU data                                                     | <b>X</b> |          |          |          |
| Parental/caregivers reports of feeding history (prior to PICU admission)                   | <b>X</b> |          |          |          |
| Feeding difficulty assessment measures                                                     |          |          |          |          |
| Infant Feeding Questionnaire<br><i>or</i><br>Behavioral Pediatric Feeding Assessment Scale | <b>X</b> | <b>X</b> | <b>X</b> | <b>X</b> |
| Parental stress measure                                                                    |          |          |          |          |
| Parental Stress Scale                                                                      | <b>X</b> | <b>X</b> | <b>X</b> | <b>X</b> |
| Parental feeding style measures                                                            |          |          |          |          |
| Infant Feeding Questionnaire<br><i>or</i><br>Child Feeding Questionnaire                   | <b>X</b> | <b>X</b> | <b>X</b> | <b>X</b> |
| Child behaviour measures                                                                   |          |          |          |          |
| Infant Behavior Questionnaire (very-short version)                                         | <b>X</b> | <b>X</b> | <b>X</b> | <b>X</b> |

|                                        |          |  |          |          |
|----------------------------------------|----------|--|----------|----------|
| <i>or</i>                              |          |  |          |          |
| Early Childhood Behavior Questionnaire |          |  |          |          |
| Qualitative interviews:                |          |  |          |          |
| Invitation                             | <b>X</b> |  |          |          |
| Interviews                             |          |  | <b>X</b> | <b>X</b> |

181

## 182 **Qualitative study**

183 The main aim of the semi-structured qualitative interviews are to develop an in-depth  
 184 understanding of how parents/caregivers of previously healthy young children ( $\leq 4$  years old)  
 185 who survive critical illness construct, experience and make sense of their survivorship journey  
 186 from PICU admission, specifically looking at feeding experiences and parental-child behaviours.  
 187 Parents will be interviewed at approximately 3 and 6 months post-PICU discharge so that they  
 188 can describe how and/or if their experiences are changing (or have changed) along the PICU  
 189 survivorship journey.

## 190 **Sample and recruitment**

### 191 **Setting**

192 Participants will be recruited from at least eight PICUs across the United Kingdom  
 193 chosen to include variation in unit size, case mix, geographical location and patient  
 194 demographic.

### 195 **Eligibility criteria**

196 The chosen inclusion criteria will allow recruitment of previously healthy young children  
 197 ( $\leq 4$  years) who are admitted to PICU both electively and in emergency situations. Participants  
 198 will be eligible if they are parents/caregivers (aged  $\geq 18$  years of age) of a previously healthy

199 child aged  $\leq 4$  years who has received invasive ventilation for 48 hours or more (including at  
 200 referring hospital if applicable) and who are ready to be discharged from PICU. See Table 2 for  
 201 full eligibility criteria.

202 **Table 2: Eligibility criteria**

| Inclusion criteria                                                                                                                                                                                                                   | Rationale                                                                                                                                                  |
|--------------------------------------------------------------------------------------------------------------------------------------------------------------------------------------------------------------------------------------|------------------------------------------------------------------------------------------------------------------------------------------------------------|
| Parents/caregivers (aged $\geq 18$ years of age) of <b>previously healthy children</b> aged $\leq 4$ years who are ready to be discharged from PICU                                                                                  | Age limit required to comply with the Research Governance Framework for Health and Social Care (40)                                                        |
| Parents/caregivers who have sufficient language skills to read the Participant Information Sheet and to complete the questionnaires in English                                                                                       | Unable to translate study materials into different languages due to limited study resources                                                                |
| Children are included if they: <ul style="list-style-type: none"> <li>• Are <math>\leq 4</math> years;</li> <li>• Have received invasive ventilation for 48 hours or more (including at referring hospital if applicable)</li> </ul> | To cover children up to school age. Used as an indicator of critical illness and seen in adult ICU survivors to affect swallowing and feeding problems(8). |
| Exclusion criteria                                                                                                                                                                                                                   | Rationale                                                                                                                                                  |
| Aged $>5$ years or older                                                                                                                                                                                                             | Age beyond preschool years                                                                                                                                 |
| Children not invasively ventilated (so no ETT)                                                                                                                                                                                       | Unable to fulfil inclusion criteria                                                                                                                        |
| Children with previous feeding difficulties (children who were <b>not</b> fully orally fed prior to PICU admission or have document oral feeding                                                                                     | Unable to fulfil inclusion criteria and unable to consume sufficient nutrients orally                                                                      |

|               |  |
|---------------|--|
| difficulties) |  |
|---------------|--|

203

**204 Sample size**

205 *Quantitative study:* The sample size is based on estimating prevalence to a certain level  
206 of precision as defined by a 95% confidence interval. Assuming a potentially low prevalence of  
207 just 20% (which is less than the NICU and CHD population owing to their underlying baseline  
208 disease,(16-20), a sample size of 204 child participants would be sufficient to estimate  
209 prevalence to within +/- 5.5%. Anticipating a 40% drop-out as often seen with online  
210 surveys,(41, 42), this requires an initial recruitment of 340 participants. We anticipate enrolling  
211 these 340 participants from at least eight PICUS in equal proportions (42 participants per site)  
212 over a 12-month recruitment phase. It is expected that recruitment will be higher during the  
213 winter months to account for seasonal admissions involving healthy children being admitted for  
214 bronchiolitis and other respiratory and/or septic illnesses. Recruitment centres will be  
215 encouraged to over recruit where possible.

216 *Qualitative study:* A realistic and pragmatic sample size of 15 to 20 parents/caregivers  
217 will be interviewed at 3 and 6 months after PICU discharge with the aim of increasing research  
218 knowledge in this field. It is not anticipated that data saturation will be achieved, as there are  
219 many different influences and variables surrounding the child's PICU admission and  
220 parent/caregivers feeding experiences and survivorship journeys.

**221 Sampling strategy**

222 *Quantitative study:* Initially, convenience sampling will be used to identify and recruit  
223 previously healthy children aged  $\geq 37$  weeks gestational age and  $\leq 4$  years who have survived an  
224 admission to PICU and their parents/caregivers. During the recruitment period, monthly  
225 progress will be monitored by the lead researcher (KM) and a proportional quota sampling

226 strategy will be used to recruit a sample representative to the UK PICU population in terms of  
 227 age. Recruitment strategies will be employed against the population strata taken from annual  
 228 UK PICU admission data,(4) (see Table 3). Both fathers and mothers will be asked to complete  
 229 the parental questionnaires where possible, to increase our understanding of the experiences  
 230 that fathers have after their child has survived intensive care.

231 **Table 3: Proportional quota sampling strategy**

| Strata (age)      | UK PICU population | Pro-rata         | Quota sample      |
|-------------------|--------------------|------------------|-------------------|
| Less than 1 year  | 45%                | 153              | 217               |
| 1 year old        | 11%                | 37               | 53                |
| 2 years old       | 6%                 | 20               | 28                |
| 3 and 4 years old | 9%                 | 30               | 42                |
| <b>Total</b>      | <b>70%</b>         | <b>240 (70%)</b> | <b>340 (100%)</b> |

232  
 233 *Qualitative study:* A purposeful sampling strategy will be used to interview a range of  
 234 parents/caregivers based on reason for admission, age of child admitted to PICU and gender of  
 235 parent (Table 4). This will ensure that not just mothers, parents/caregivers of planned surgery or  
 236 parents/caregivers of babies are only interviewed for example.

237 **Table 4: Sampling framework for interviews**

| Inclusion criteria                                             | Rationale                                                                   |
|----------------------------------------------------------------|-----------------------------------------------------------------------------|
| Parents/caregivers of children enrolled into<br>The PIES Study | To be able to compare experiences with<br>quantitative data from the survey |
| Mothers and fathers                                            | To obtain experiences of both mothers and<br>fathers                        |



|                                                                                                                                                                                                             |                                                                                                                                                                                                         |
|-------------------------------------------------------------------------------------------------------------------------------------------------------------------------------------------------------------|---------------------------------------------------------------------------------------------------------------------------------------------------------------------------------------------------------|
| Emergency and planned admission                                                                                                                                                                             | To obtain experiences of parents/caregivers dealing with both planned and emergency admission as there is often psychological sequelae associated with emergency verses planned admissions to PICU (43) |
| Age of child: <ul style="list-style-type: none"> <li>• ≤ 6 months (or pre-weaned babies)</li> <li>• &gt; 6 months to 1 year</li> <li>• &gt; 1 year to 2 years</li> <li>• &gt; 2 years to 4 years</li> </ul> | To obtain differing experiences of feeding during significant developmental feeding milestones for example weaning verses autonomous child self-feeding during pre-school years (44)                    |

238

239 **Study procedures**

240 *Quantitative study:* Over a 12-month period, each site will screen daily the children  
 241 admitted to PICU and invite all eligible children and their parents/caregivers to participate in the  
 242 study. Site investigators (or their designated nominee) who are part of the PICU clinical care  
 243 team will determine eligibility. Parents/caregivers could be approached to take part in the study  
 244 when the child is still in PICU, near to or at discharge, on the High Dependency Unit or hospital  
 245 ward soon after being discharged from PICU. Once informed consent has been obtained,  
 246 parents/caregivers will be asked to complete baseline questionnaires (paper or online options  
 247 available). Parent/caregiver contact details will be obtained and securely recorded on a  
 248 password protected database to enable follow-up survey distribution at 1, 3 and 6 months.  
 249 Follow-up survey data will be collected using either online or paper questionnaires as agreed by  
 250 the parents/caregivers at recruitment. Online questionnaires will be managed through the  
 251 iSurvey software (<https://www.isurvey.soton.ac.uk/>, University of Southampton. Two fortnightly

1  
2  
3 252 reminders will be sent for the follow-up surveys as reminder letters, telephone calls, messages  
4  
5 253 or email by the lead researcher (KM) as agreed with the participant at recruitment. As there is  
6  
7 254 such a small-time frame between 1 and 3 month assessments, if no response is received  
8  
9 255 following the 1-month survey, participants will still be approached at 3 months. If there is no  
10  
11 256 response at this point, they will not be approached again at 6 months.  
12  
13

14 257 *Qualitative study:* During recruitment into the multicentred survey, parents/caregivers  
15  
16 258 will be invited to take part in the qualitative interviews. Those who consent to an interview will  
17  
18 259 be approached by the lead researcher (KM) at the time in which reminders of the follow-up  
19  
20 260 survey are sent (at 1, 3 and 6 months) either by reminder letters, telephone call, messages or  
21  
22 261 email as agreed at survey enrolment. Semi-structured open-ended questions will be used as the  
23  
24 262 primary method of data collection to allow the parent/caregiver to describe their story,  
25  
26 263 communicate their experiences, feelings and PICU survivorship journey. In response to PPI  
27  
28 264 feedback highlighting the lack of spare time that parents/caregivers of young children often  
29  
30 265 face, telephone and internet (i.e. Microsoft teams: Microsoft 365, UK) interviews will be  
31  
32 266 conducted at a time convenient for the parent/caregiver which could include evenings and  
33  
34 267 weekends.  
35  
36  
37  
38

### 39 268 **Data analysis**

40  
41 269 All data obtained will be analysed. In circumstances where participants are deemed lost  
42  
43 270 to follow-up, any data supplied will be analysed and used where appropriate, even if it can only  
44  
45 271 be used to describe the cohort at baseline. A pragmatic approach to missing data will be used,  
46  
47 272 whereby data will be analysed as much as possible. Data from non-responders will be used  
48  
49 273 within the analysis to observe for nonresponse bias.  
50  
51

### 52 274 **Quantitative study data analysis**

1  
2  
3 275 Descriptive statistics will be used to present the demographic data and information  
4  
5 276 collected from the medical PICU admissions data. All child and parent/caregiver measures will  
6  
7 277 be calculated, including means, SD, medians and IQRs for continuous variables and frequency  
8  
9 278 counts and percentages for categorical data. Data will be examined for normality, outliers and  
10  
11 279 for missing data. Statistical analysis will be completed using the IBM Statistical Package for Social  
12  
13  
14 280 Science (SPSS) and statistical significance will be set at  $p < 0.05$ .

15  
16  
17 281 Analyses related to the study specific objectives include the following:

18  
19 282 *Objective 1: To characterise and measure the prevalence of feeding difficulties in previously*  
20  
21 283 *healthy children ( $\leq 4$  years) who survive critical illness during the first 6 months after PICU*  
22  
23 284 *discharge. From the feeding difficulty assessment measures, descriptive statistics (frequency*  
24  
25 285 *counts and percentages) will be used to identify the numbers and types of feeding difficulties at*  
26  
27  
28 286 *each time point collected and for different age groups.*

29  
30 287 *Objective 2: To identify clinical predictors for the development of feeding difficulties in previously*  
31  
32 288 *healthy young children ( $\leq 4$  years) who survive critical illness. The information from the routinely*  
33  
34 289 *collected clinical PICU data will be used to identify any clinical predictors for the development of*  
35  
36 290 *feeding difficulties, such as length of intubation and time to commence oral feeding. Statistical*  
37  
38 291 *analysis will involve multiple +/- linear regressions to see if we can predict feeding difficulty*  
39  
40 292 *questionnaire scores from the clinical variables.*

41  
42  
43 293 *Objective 3: To identify parental/caregiver feeding styles for previously healthy young children ( $\leq$*   
44  
45 294 *4 years) who survive critical illness. Descriptive statistics will be initially performed to identify*  
46  
47 295 *the frequency of participants in each parental feeding style, to identify the majority. This will*  
48  
49 296 *then be repeated at each time point collected, to identify a change (or not) in parental feeding*  
50  
51 297 *style across the 6 months from PICU discharge. If have enough data, differences between*  
52  
53 298 *mother feeding styles and father feeding styles will be calculated using Mann-Whitney U (non-*  
54  
55  
56  
57  
58  
59  
60

1  
2  
3 299 parametric) or t-Test (parametric) tests as appropriate. The relationship between parental  
4  
5 300 feeding style and feeding difficulty score will also be tested using the same statistical tests.  
6  
7 301 *Objective 4: To measure parental stress in parents/caregivers of previously healthy young*  
8  
9 302 *children ( $\leq 4$  years) who survive critical illness.* Using the scores from the parental stress scale,  
10  
11 303 average parental stress scores for all participants will be calculated at all time points. Average  
12  
13 304 parental stress score at each time point, for those parents of children with and without feeding  
14  
15 305 difficulties, will also be presented to identify the trajectories of parental stress over time and  
16  
17 306 between the two groups. Correlations between increasing feeding difficulty score and increasing  
18  
19 307 parental stress score will be assessed using scatterplot graphs, and differences will be tested for  
20  
21 308 statistical significance using Pearsons (parametric) or Spearmans (non-parametric) tests where  
22  
23 309 appropriate.

24  
25 310 *Objective 5: To identify behaviours of previously healthy young children ( $\leq 4$  years) who survive*  
26  
27 311 *critical illness.* Frequency of children in each temperament category from the Infant and Early  
28  
29 312 Child Behavior questionnaires will be calculated and presented at each data collection time  
30  
31 313 point, so observe for changes over time. The relationship between infant/child temperament  
32  
33 314 and feeding difficulty score; and parental feeding style and parental stress score will be assessed  
34  
35 315 using Mann-Whitney U (non- parametric) or t-Test (parametric) and regression models where  
36  
37 316 appropriate.

### 317 **Qualitative study data analysis**

318 All interviews will be audio-recorded and transcribed verbatim. All data will be imported  
319 into a qualitative data analysis package (NVivo), which will assist in managing, sorting and coding  
320 the vast data set. Data analysis will be largely conducted by KM, with the other researchers  
321 (ASD, LVM) verifying the findings for consistencies and discrepancies to maximise credibility and  
322 reliability,(45). Data analysis will involve three stages:1) narrative analysis, 2) thematic analysis

1  
2  
3 323 and 3) integration and will look to answer study *objective 6: To develop an in-depth*  
4  
5 324 *understanding of how parents/caregivers of previously healthy young children (≤ 4 years old)*  
6  
7 325 *who survive critical illness construct, experience and make sense of their survivorship journey*  
8  
9  
10 326 *from PICU admission, specifically looking at feeding experiences and parental-child relationships.*

11  
12 327 Stage 1: Narrative analysis: The first stage of analysis will involve analysing the content of the  
13  
14 328 data from each participant's interview using the Clandinin and Connelly's (46) method of  
15  
16 329 narrative inquiry. This framework uses three domains to structure the analysis: temporality,  
17  
18 330 sociality and place,(47). The analysis focuses on the actual storylines that are told and emotions  
19  
20 331 that are used to tell the story, the societal and cultural impact on the story and the influence of  
21  
22 332 the place in which the experience occurs,(46). An additional consideration of the actual words  
23  
24 333 and language, both verbal and nonverbal, used throughout the narrative will also be used during  
25  
26 334 the analysis,(46).

27  
28  
29  
30 335 Stage 2: Thematic analysis: The second stage of analysis will involve a thematic analysis  
31  
32 336 approach, whereby repeated patterns across the stage 1 analysis will be identified, leading to  
33  
34 337 the detection of codes and themes across the entire data set,(48). This will enable meaning and  
35  
36 338 patterns to emerge from the data.

37  
38  
39 339 Stage 3: Data integration: The final step of the qualitative data analysis will involve integrating  
40  
41 340 the narrative and thematic analysis. The individual stories will be re-told in a coherent manner  
42  
43 341 and then the key themes across the entire data set will be presented. This will provide a detailed  
44  
45 342 description and understanding of the survivorship journey of parents/caregivers of previously  
46  
47 343 health children who survive critical illness.

#### 344 **Data integration strategy of quantitative and qualitative data**

345 As a concurrent mixed methods design, the quantitative data from the survey and the  
346 qualitative data from the interviews will be analysed concurrently as they are collected and then

1  
2  
3 347 integrated to answer the overarching research questions and aims. The qualitative data will  
4  
5 348 strengthen the survey findings by adding the human perspective, exploring behaviour, feelings  
6  
7 349 and experiences of the parents/caregivers told by them,(49). The information gained from the  
8  
9  
10 350 interviews will assist interpretation and analysis of the survey results, drawing conclusions to  
11  
12 351 the clinical significance of the results with implications for clinical practice,(50).

### 14 352 **Public and patient involvement**

16 353 Guided by the NIHR INVOLVE recommendations,(51), involvement of families of children  
17  
18 354 recently discharged from PICU was sought during the study design process. Six parents  
19  
20  
21 355 volunteered to provide guidance and advice during an organised coffee morning. Collectively,  
22  
23 356 the importance of the study was recognised, and recommendations made to the recruitment  
24  
25 357 process and data collection methods. Feedback included using an online questionnaire for ease  
26  
27  
28 358 of use and to increase follow-up completion. The survey questions were also piloted by parents,  
29  
30 359 assessing the clarity of the questionnaires and their instructions and to consider the burden of  
31  
32 360 completing all four questionnaires. Offering home, telephone and internet interviews was also  
33  
34  
35 361 suggested for the interviews.

### 36 362 **Ethics and Dissemination**

#### 39 363 **Informed consent**

41 364 Parents/caregivers will be approached to take part in The PIES study once the child  
42  
43 365 meets the inclusion/exclusion criteria. After being given an ethically approved Participant  
44  
45 366 Information Sheet (PIS), parents/caregivers will be given at least 48 hours to consider  
46  
47  
48 367 participation, unless they are happy to give informed consent before this time. It is anticipated  
49  
50 368 that the children eligible for the study will be too young and/or too ill to participate directly in  
51  
52 369 the consent process. Each parent/caregiver will complete a contact form that will record the  
53  
54  
55  
56  
57  
58  
59  
60

1  
2  
3 370 information needed for the follow-up survey distribution (e.g. mail addresses, telephone  
4  
5 371 numbers) and informed consent will be obtained to allow the sharing of this personal data.  
6

7  
8 372 **Researching sensitive and emotive topics**  
9

10 373 It is recognised that parents/caregivers of previously healthy young children who have  
11  
12 374 survived critical illness may have psychological sequelae (i.e. post-traumatic stress disorder)  
13  
14 375 following their child's admission to PICU,(43). Although not specifically asking about their PICU  
15  
16 376 experience, completing the survey and taking part in the interviews may raise potentially  
17  
18 377 distressing issues around difficult feeding and/or mealtime behaviours following the PICU  
19  
20 378 admission. If any participant becomes distressed by recalling their experience during the  
21  
22 379 interviews, the interview will be immediately stopped. The researcher (KM) will aim to debrief  
23  
24 380 the situation at the time and will refer onto the relevant agencies such as Patient Advice and  
25  
26 381 Liaison Services (PALS), clinical psychology team and their own or child's health team. The  
27  
28 382 survey will encourage participants to inform the researcher of any problems or distress  
29  
30 383 experienced during they survey completion. The researcher will be able to pinpoint sources of  
31  
32 384 help through their local health care services where possible.  
33  
34  
35

36  
37 385 **Burden**  
38

39 386 The survey is compiled of four separate pre-existing validated questionnaires, asked at  
40  
41 387 four separate timepoints during the enrolment and follow-up (at recruitment, at 1, 3 and 6  
42  
43 388 months after PICU discharge). The questionnaires include Likert scales, yes/no answers and  
44  
45 389 drop-down options. The survey questions and instructions have been piloted by parents of  
46  
47 390 young children, assessing the clarity of the questionnaires, the instructions and consideration of  
48  
49 391 the time and mental burden in completing all four questionnaires. Average time for survey  
50  
51 392 completion was 15 minutes, with follow-up surveys thought to be quicker. We endeavour to  
52  
53 393 reduce this burden by having the option of an online electronic survey available to parents and  
54  
55  
56  
57  
58  
59  
60

1  
2  
3 394 by adding the feature where you can 'save and go back to later' option within the survey. The  
4  
5 395 PIS will clearly state that there will be no financial gain from taking part in the study. Conversely,  
6  
7 396 some participants might find taking part in the study beneficial because they will have the time  
8  
9 397 and space to think about issues which are important to them.

#### 11 398 **Ethical review**

12  
13  
14 399 The Yorkshire and The Humber – South Yorkshire Research Ethics Committee has  
15  
16 400 reviewed the study protocol and provided favourable opinion (Ref: 20/YH/0160). The Health  
17  
18 401 Research Authority has also approved the protocol (IRAS: 279171). This study has been  
19  
20  
21 402 extensively peer reviewed through the University of Southampton and forms the PhD study of  
22  
23 403 the first author.

#### 24 404 **Methods of dissemination**

25  
26  
27  
28 405 This paper is part of the dissemination plan of the PIES study, by presenting the project  
29  
30 406 background, providing a detailed description of methods and procedures used to collect and  
31  
32 407 analyse the data. Other dissemination plans involve local, national and international audiences  
33  
34 408 including academics, health care professionals, healthcare commissioners, charities and the  
35  
36 409 public. Dissemination will include written and oral feedback to the PPI group, local PICU charity  
37  
38 410 and each recruitment centre. Presentations to local and national research and clinical teams will  
39  
40 411 take place, including research meetings and conferences. The findings from this study will  
41  
42 412 contribute to addressing the significant gaps in the literature by investigating the prevalence of  
43  
44 413 and predictors for feeding difficulties experienced by previously healthy young children who  
45  
46 414 survive critical illness and explore the effect on parental feeding experiences, behaviours and  
47  
48 415 stress. It is anticipated that the expected outputs of this proposed project will be in terms of  
49  
50 416 high quality, peer-reviewed scientific publications and conference presentations. During the  
51  
52  
53  
54  
55  
56  
57  
58  
59  
60



1  
2  
3  
4  
5  
6  
7  
8  
9  
10  
11  
12  
13  
14  
15  
16  
17  
18  
19  
20  
21  
22  
23  
24  
25  
26  
27  
28  
29  
30  
31  
32  
33  
34  
35  
36  
37  
38  
39  
40  
41  
42  
43  
44  
45  
46  
47  
48  
49  
50  
51  
52  
53  
54  
55  
56  
57  
58  
59  
60

417 informed consent process, parents/caregivers will be asked if they would like a lay summary of  
418 any study findings sent to them at the end of the study.

For peer review only

419 **References**

- 420 1. Kanthimathinathan HK, Plunkett A, Scholefield BR, Pearson GA, Morris KP.  
421 Trends in long-stay admissions to a UK paediatric intensive care unit. *Archives of disease*  
422 *in childhood*. 2019.
- 423 2. Davis P, Stutchfield C, Evans TA, Draper E. Increasing admissions to paediatric  
424 intensive care units in England and Wales: more than just rising a birth rate. *Archives of*  
425 *disease in childhood*. 2018;103(4):341-5.
- 426 3. Colville G, Pierce C. Patterns of post-traumatic stress symptoms in families after  
427 paediatric intensive care. *Intensive Care Med*. 2012;38(9):1523-31.
- 428 4. (PICANET) PICAN. Annual Report 2017/2017 27 May 2018. Available from:  
429 [http://www.picanet.org.uk/Audit/Annual-](http://www.picanet.org.uk/Audit/Annual-Reporting/PICANet_2017_Annual_Report_Summary_v1.0_FINAL.pdf)  
430 [Reporting/PICANet\\_2017\\_Annual\\_Report\\_Summary\\_v1.0\\_FINAL.pdf](http://www.picanet.org.uk/Audit/Annual-Reporting/PICANet_2017_Annual_Report_Summary_v1.0_FINAL.pdf).
- 431 5. Manning JC, Hemingway P, Redsell SA. Survived so what? Identifying priorities  
432 for research with children and families post-paediatric intensive care unit. *Nursing in*  
433 *critical care*. 2018;23(2):68-74.
- 434 6. Leder SB. Incidence and type of aspiration in acute care patients requiring  
435 mechanical ventilation via a new tracheotomy. *Chest*. 2002;122(5):1721-6.
- 436 7. Tolep K, Getch CL, Criner GJ. Swallowing dysfunction in patients receiving  
437 prolonged mechanical ventilation. *Chest*. 1996;109(1):167-72.
- 438 8. Skoretz SA, Flowers HL, Martino R. The incidence of dysphagia following  
439 endotracheal intubation: a systematic review. *Chest*. 2010;137(3):665-73.
- 440 9. Macht M, Wimbish T, Clark BJ, Benson AB, Burnham EL, Williams A, et al.  
441 Postextubation dysphagia is persistent and associated with poor outcomes in survivors of  
442 critical illness. *Crit Care*. 2011;15(5):R231.
- 443 10. Merriweather JL, Salisbury LG, Walsh TS, Smith P. Nutritional care after critical  
444 illness: a qualitative study of patients' experiences. *Journal of human nutrition and*  
445 *dietetics : the official journal of the British Dietetic Association*. 2016;29(2):127-36.
- 446 11. Merriweather J, Smith P, Walsh T. Nutritional rehabilitation after ICU - does it  
447 happen: a qualitative interview and observational study. *Journal of clinical nursing*.  
448 2014;23(5-6):654-62.
- 449 12. Tume LN, Valla FV, Joosten K, Jotterand Chaparro C, Latten L, Marino LV, et  
450 al. Nutritional support for children during critical illness: European Society of Pediatric  
451 and Neonatal Intensive Care (ESPNIC) metabolism, endocrine and nutrition section  
452 position statement and clinical recommendations. *Intensive care medicine*. 2020.
- 453 13. Mehta NM, Skillman HE, Irving SY, Coss-Bu JA, Vermilyea S, Farrington EA, et  
454 al. Guidelines for the Provision and Assessment of Nutrition Support Therapy in the  
455 Pediatric Critically Ill Patient: Society of Critical Care Medicine and American Society  
456 for Parenteral and Enteral Nutrition. *Pediatr Crit Care Med*. 2017;18(7):675-715.
- 457 14. Rennick JE, Johnston CC, Dougherty G, Platt R, Ritchie JA. Children's  
458 psychological responses after critical illness and exposure to invasive technology. *J Dev*  
459 *Behav Pediatr*. 2002;23(3):133-44.
- 460 15. Savage JS, Fisher JO, Birch LL. Parental influence on eating behavior: conception  
461 to adolescence. *J Law Med Ethics*. 2007;35(1):22-34.
- 462 16. Hawdon JM, Beauregard N, Slattery J, Kennedy G. Identification of neonates at  
463 risk of developing feeding problems in infancy. *Dev Med Child Neurol*. 2000;42(4):235-  
464 9.

- 1  
2  
3 465 17. Einarson KD, Arthur HM. Predictors of oral feeding difficulty in cardiac surgical  
4 466 infants. *Pediatric nursing*. 2003;29(4):315-9.
- 5 467 18. Kogon BE, Ramaswamy V, Todd K, Plattner C, Kirshbom PM, Kanter KR, et al.  
6 468 Feeding difficulty in newborns following congenital heart surgery. *Congenital heart*  
7 469 *disease*. 2007;2(5):332-7.
- 8 470 19. Jadcherla SR, Vijayapal AS, Leuthner S. Feeding abilities in neonates with  
9 471 congenital heart disease: a retrospective study. *J Perinatol*. 2009;29(2):112-8.
- 10 472 20. Indramohan G, Pedigo TP, Rostoker N, Cambare M, Grogan T, Federman MD.  
11 473 Identification of Risk Factors for Poor Feeding in Infants with Congenital Heart Disease  
12 474 and a Novel Approach to Improve Oral Feeding. *Journal of pediatric nursing*.  
13 475 2017;35:149-54.
- 14 476 21. Tregay J, Wray J, Crowe S, Knowles R, Daubeney P, Franklin R, et al. Going  
15 477 home after infant cardiac surgery: a UK qualitative study. *Arch Dis Child*.  
16 478 2016;101(4):320-5.
- 17 479 22. Powell-Tuck J. Nutritional interventions in critical illness. *The Proceedings of the*  
18 480 *Nutrition Society*. 2007;66(1):16-24.
- 19 481 23. Mehta NM, Skillman HE, Irving SY, Coss-Bu JA, Vermilyea S, Farrington EA, et  
20 482 al. Guidelines for the Provision and Assessment of Nutrition Support Therapy in the  
21 483 Pediatric Critically Ill Patient: Society of Critical Care Medicine and American Society  
22 484 for Parenteral and Enteral Nutrition. *JPEN Journal of parenteral and enteral nutrition*.  
23 485 2017;41(5):706-42.
- 24 486 24. Senez C, Guys JM, Mancini J, Paz Paredes A, Lena G, Choux M. Weaning  
25 487 children from tube to oral feeding. *Childs Nerv Syst*. 1996;12(10):590-4.
- 26 488 25. Dello Strologo L, Principato F, Sinibaldi D, Appiani AC, Terzi F, Dartois AM, et  
27 489 al. Feeding dysfunction in infants with severe chronic renal failure after long-term  
28 490 nasogastric tube feeding. *Pediatric nephrology (Berlin, Germany)*. 1997;11(1):84-6.
- 29 491 26. Briassoulis GC, Zavras NJ, Hatzis MT. Effectiveness and safety of a protocol for  
30 492 promotion of early intragastric feeding in critically ill children. *Pediatric critical care*  
31 493 *medicine : a journal of the Society of Critical Care Medicine and the World Federation of*  
32 494 *Pediatric Intensive and Critical Care Societies*. 2001;2(2):113-21.
- 33 495 27. Lutz KF. Feeding Problems of NICU and PICU Graduates: Perceptions of Parents  
34 496 and Providers. *Newborn and infant nursing reviews : NAINR*. 2012;12(4):207-13.
- 35 497 28. Kerzner B. Clinical investigation of feeding difficulties in young children: a  
36 498 practical approach. *Clin Pediatr (Phila)*. 2009;48(9):960-5.
- 37 499 29. Kerzner B, Milano K, MacLean WC, Jr., Berall G, Stuart S, Chatoor I. A practical  
38 500 approach to classifying and managing feeding difficulties. *Pediatrics*. 2015;135(2):344-  
39 501 53.
- 40 502 30. Goday PS, Huh SY, Silverman A, Lukens CT, Dodrill P, Cohen SS, et al.  
41 503 *Pediatric Feeding Disorder: Consensus Definition and Conceptual Framework*. *J Pediatr*  
42 504 *Gastroenterol Nutr*. 2019;68(1):124-9.
- 43 505 31. Levy Y, Levy A, Zangen T, Kornfeld L, Dalal I, Samuel E, et al. Diagnostic clues  
44 506 for identification of nonorganic vs organic causes of food refusal and poor feeding. *J*  
45 507 *Pediatr Gastroenterol Nutr*. 2009;48(3):355-62.
- 46 508 32. Levine A, Bachar L, Tsangen Z, Mizrachi A, Levy A, Dalal I, et al. Screening  
47 509 criteria for diagnosis of infantile feeding disorders as a cause of poor feeding or food  
48 510 refusal. *J Pediatr Gastroenterol Nutr*. 2011;52(5):563-8.

- 1  
2  
3 511 33. Wright CM, Parkinson KN, Drewett RF. How does maternal and child feeding  
4 512 behavior relate to weight gain and failure to thrive? Data from a prospective birth cohort.  
5 513 *Pediatrics*. 2006;117(4):1262-9.
- 6 514 34. Crist W MP, Beck M, Gillespie C, Barrett P, Matthews J. Behavior at mealtimes  
7 515 and the young child with cystic fibrosis. *Journal of Developmental Behavior in*  
8 516 *Pediatrics*. 1994;15:157 - 61.
- 9 517 35. Berry J, Jones, WH. The Parental Stress Scale: initial psychometric evidence.  
10 518 *Journal of Social and Personal Relationships*. 1995;12:463 - 72.
- 11 519 36. Baughcum AE, Powers SW, Johnson SB, Chamberlin LA, Deeks CM, Jain A, et  
12 520 al. Maternal feeding practices and beliefs and their relationships to overweight in early  
13 521 childhood. *J Dev Behav Pediatr*. 2001;22(6):391-408.
- 14 522 37. Birch LL, Fisher JO, Grimm-Thomas K, Markey CN, Sawyer R, Johnson SL.  
15 523 Confirmatory factor analysis of the Child Feeding Questionnaire: a measure of parental  
16 524 attitudes, beliefs and practices about child feeding and obesity proneness. *Appetite*.  
17 525 2001;36(3):201-10.
- 18 526 38. Putnam SP, Helbig AL, Gartstein MA, Rothbart MK, Leerkes E. Development  
19 527 and assessment of short and very short forms of the infant behavior questionnaire-  
20 528 revised. *J Pers Assess*. 2014;96(4):445-58.
- 21 529 39. Putnam SP, Rothbart MK. Development of short and very short forms of the  
22 530 Children's Behavior Questionnaire. *J Pers Assess*. 2006;87(1):102-12.
- 23 531 40. Health Do. Research governance framework for health and social care. In: Health  
24 532 Do, editor. London: DoH; 2005.
- 25 533 41. Smeeth L, Fletcher AE. Improving the response rates to questionnaires. *Bmj*.  
26 534 2002;324(7347):1168-9.
- 27 535 42. Pulham RA, Wray J, Feinstein Y, Brown K, Pierce C, Nadel S, et al. Feasibility  
28 536 and Acceptability of Methods to Collect Follow-Up Information From Parents 12 Months  
29 537 After Their Child's Emergency Admission to Pediatric Intensive Care. *Pediatric critical*  
30 538 *care medicine : a journal of the Society of Critical Care Medicine and the World*  
31 539 *Federation of Pediatric Intensive and Critical Care Societies*. 2019;20(4):e199-e207.
- 32 540 43. Shudy M, de Almeida ML, Ly S, Landon C, Groft S, Jenkins TL, et al. Impact of  
33 541 pediatric critical illness and injury on families: a systematic literature review. *Pediatrics*.  
34 542 2006;118 Suppl 3:S203-18.
- 35 543 44. Wickenden M. The development and disruption of feeding skills in babies and  
36 544 young children. In: Southall A, Martin, Clarrissa, editor. *Feeding problems in children; a*  
37 545 *practical guide*. 2nd ed. Oxford: Radcliffe Publishings; 2011. p. 2 - 28.
- 38 546 45. Mays NP, C. *Qualitative Research in Health Care*. London: BMJ Publishing  
39 547 Group; 1996.
- 40 548 46. Clandinin DJ CF. *Narrative Inquiry; Experience and Story in Qualitative*  
41 549 *Research*. San Francisco CA: Jossey-Bass; 2000.
- 42 550 47. Haydon G, Browne, G and van der Riet, P. Narrative inquiry as a research  
43 551 methodology exploring personcentred care in nursing. *Collegian*. 2018;25:125 - 9.
- 44 552 48. Braun VaC, V. Using thematic analysis in psychology. *Qualitative Research in*  
45 553 *Psychology*. 2006;3(2):77-101.
- 46 554 49. Holloway IaW, S. *Qualitative Research in Nursing and Healthcare (3rd Edition)*.  
47 555 *Oxford: Wiley-Blackwell; 2010.*

1  
2  
3 556 50. Polit DaB, CT. Essentials of Nursing Reseach: Appraising evidence for nursing  
4 557 practice (9th Edition). Philadephia: Wolters Kluwer; 2017.

5 558 51. INVOLVE. Briefing notes for researchers: involving the public in NHS, public  
6 559 health and social care research. In: INVOLVE, editor. Eastleigh: INVOLVE; 2012.  
7 560

8  
9  
10 561 **Acknowledgements**

11  
12 562 The PIES study protocol was developed by KM, LVM and ASD. The corresponding author would  
13  
14 563 like to acknowledge LVM and ASD in their supervisory support during KM's PhD in which The  
15  
16 564 PIES Study has been developed. KM would like to acknowledge the University of Southampton  
17  
18 565 and University Hospital Southampton NHS Foundation Trust in supporting and funding her PhD  
19  
20 566 through the Wessex Clinical Doctoral Research Fellowship scheme, and the clinical team at  
21  
22 567 Southampton Children's Hospital PICU in allowing KM the clinical backfill time to undertake her  
23  
24 568 PhD. Furthermore, KM would like to acknowledge Kevin Wheeler (Clinical Informatics Research  
25  
26 569 Unit, Southampton) for his support and patience in developing the PIES study data capture and  
27  
28 570 management though the ALEA database/eCRF.  
29  
30  
31

32 571

33  
34 572 **Conflict of interest**

35  
36 573 None declared  
37  
38 574

39  
40 575 **Statement of authorship**

41  
42 576 Authors made the following contribution to the manuscript:

43  
44 577 (1) KM formulated the original research idea, conducted the literature searching and is the  
45  
46 578 chief investigator for the study,

47  
48 579 (2) KM drafted the manuscript from the ethically approved protocol (which was originally  
49  
50 580 supported by LVM and ASD)  
51  
52  
53  
54  
55  
56  
57  
58  
59  
60

1  
2  
3 581 (3) LVM, ASD and KM reviewed and revised the manuscript for important intellectual  
4  
5 582 content, and (4) all authors provided final approval of the version to be submitted.  
6  
7  
8 583

9  
10 584 **Data Statement**

11  
12 585 Technical appendix, statistical code, and dataset for The PIES study will be available from the  
13  
14 586 University of Southampton Institutional Research Repository, ePrints Soton  
15  
16 587 (<https://eprints.soton.ac.uk/>)  
17  
18

19 588

20  
21 589 **Funding**

22  
23 590 This report describes independent research arising from a personal Clinical Doctoral Research  
24  
25 591 Fellowship for Kathryn Morton, supported jointly by the University of Southampton and  
26  
27 592 University Hospital Southampton NHS Foundation Trust, England.  
28  
29  
30  
31  
32  
33  
34  
35  
36  
37  
38  
39  
40  
41  
42  
43  
44  
45  
46  
47  
48  
49  
50  
51  
52  
53  
54  
55  
56  
57  
58  
59  
60

1  
2  
3  
4  
5  
6  
7  
8  
9  
10  
11  
12  
13  
14  
15  
16  
17  
18  
19  
20  
21  
22  
23  
24  
25  
26  
27  
28  
29  
30  
31  
32  
33  
34  
35  
36  
37  
38  
39  
40  
41  
42  
43  
44  
45  
46  
47

1 **Figure 1: Overview of The PIES study design**

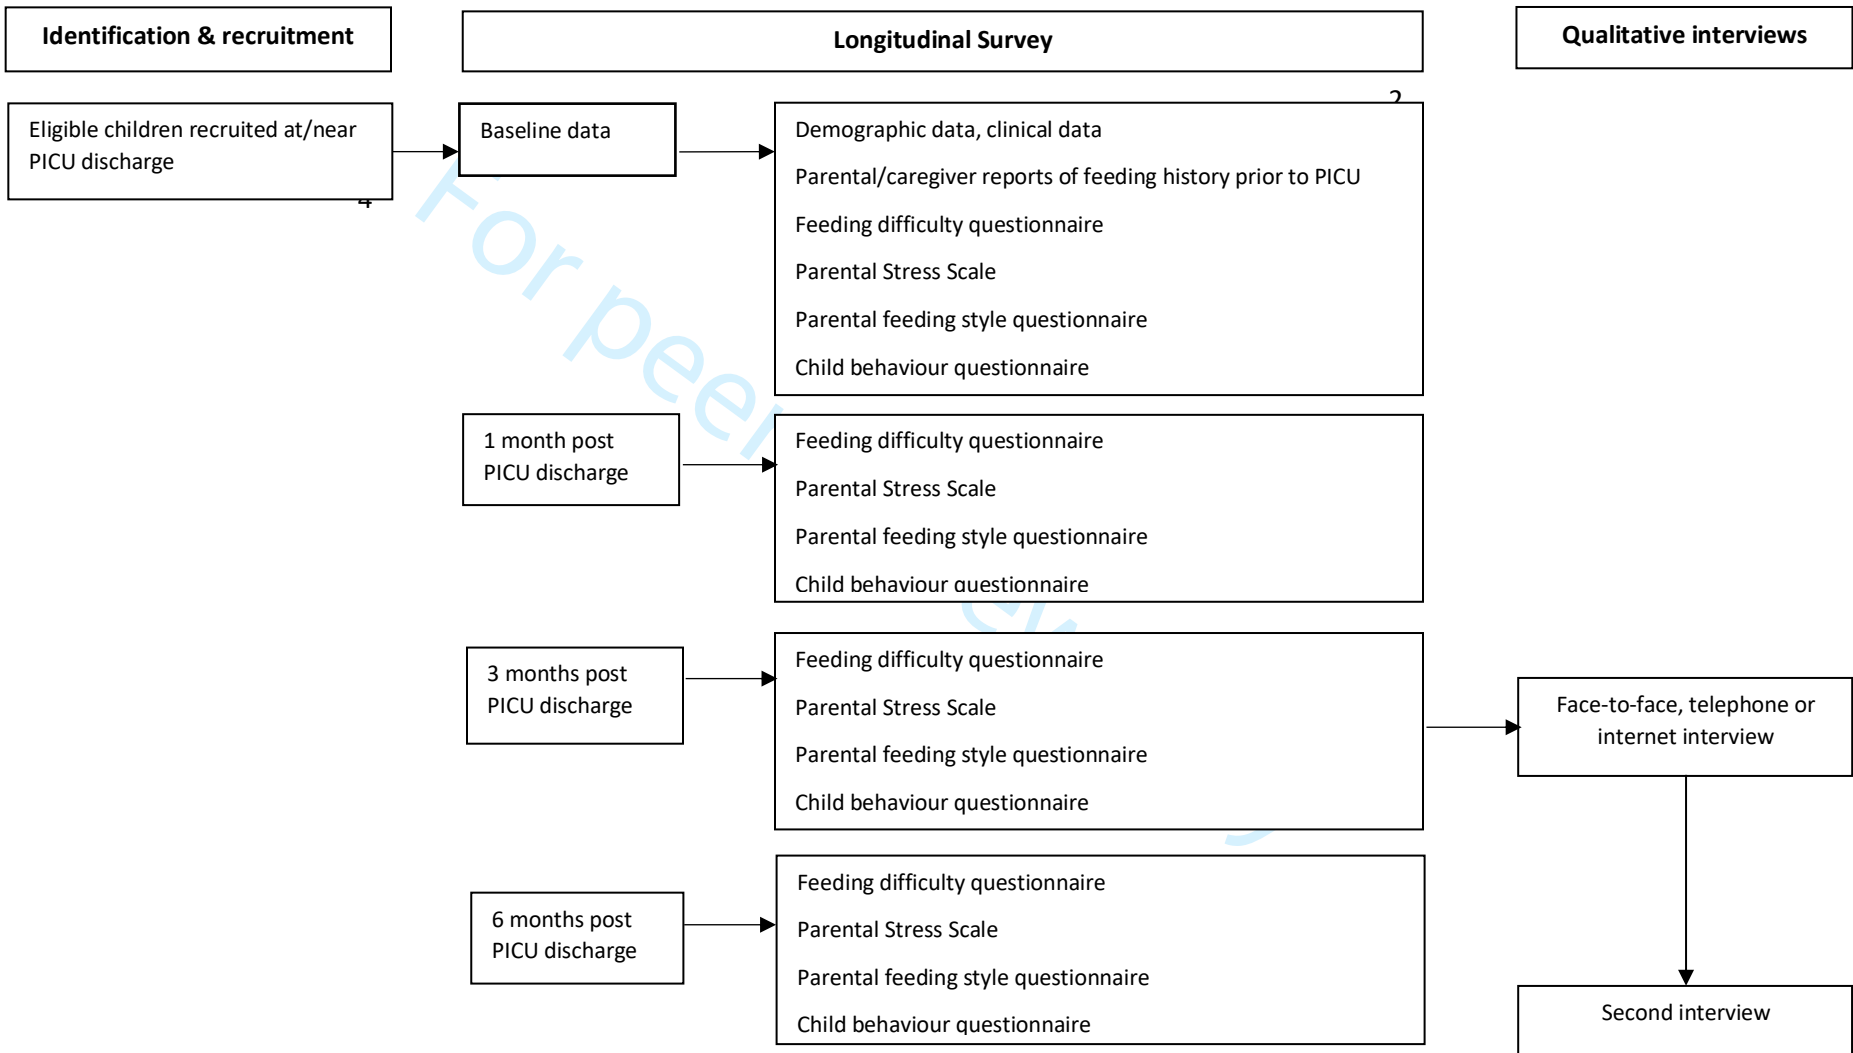

# Reporting checklist for protocol of a clinical trial.

Based on the SPIRIT guidelines.

## Instructions to authors

Complete this checklist by entering the page numbers from your manuscript where readers will find each of the items listed below.

Your article may not currently address all the items on the checklist. Please modify your text to include the missing information. If you are certain that an item does not apply, please write "n/a" and provide a short explanation.

Upload your completed checklist as an extra file when you submit to a journal.

In your methods section, say that you used the SPIRIT reporting guidelines, and cite them as:

Chan A-W, Tetzlaff JM, Altman DG, Laupacis A, Gøtzsche PC, Krleža-Jerić K, Hróbjartsson A, Mann H, Dickersin K, Berlin J, Doré C, Parulekar W, Summerskill W, Groves T, Schulz K, Sox H, Rockhold FW, Rennie D, Moher D. SPIRIT 2013 Statement: Defining standard protocol items for clinical trials. *Ann Intern Med.* 2013;158(3):200-207

|                                   |                                                                                                                                 |  | Page   |
|-----------------------------------|---------------------------------------------------------------------------------------------------------------------------------|--|--------|
|                                   | Reporting Item                                                                                                                  |  | Number |
| <b>Administrative information</b> |                                                                                                                                 |  |        |
| Title                             | <a href="#">#1</a> Descriptive title identifying the study design, population, interventions, and, if applicable, trial acronym |  | 1      |



|    |                     |                     |                                                            |          |
|----|---------------------|---------------------|------------------------------------------------------------|----------|
| 1  | Trial registration  | <a href="#">#2a</a> | Trial identifier and registry name. If not yet registered, | N/A      |
| 2  |                     |                     | name of intended registry                                  |          |
| 3  |                     |                     |                                                            |          |
| 4  |                     |                     |                                                            |          |
| 5  |                     |                     |                                                            |          |
| 6  | Trial registration: | <a href="#">#2b</a> | All items from the World Health Organization Trial         | NA       |
| 7  | data set            |                     | Registration Data Set                                      |          |
| 8  |                     |                     |                                                            |          |
| 9  |                     |                     |                                                            |          |
| 10 |                     |                     |                                                            |          |
| 11 | Protocol version    | <a href="#">#3</a>  | Date and version identifier                                | 3        |
| 12 |                     |                     |                                                            |          |
| 13 |                     |                     |                                                            |          |
| 14 |                     |                     |                                                            |          |
| 15 | Funding             | <a href="#">#4</a>  | Sources and types of financial, material, and other        | 27       |
| 16 |                     |                     | support                                                    |          |
| 17 |                     |                     |                                                            |          |
| 18 |                     |                     |                                                            |          |
| 19 |                     |                     |                                                            |          |
| 20 | Roles and           | <a href="#">#5a</a> | Names, affiliations, and roles of protocol contributors    | 1 and 25 |
| 21 | responsibilities:   |                     |                                                            |          |
| 22 |                     |                     |                                                            |          |
| 23 | contributorship     |                     |                                                            |          |
| 24 |                     |                     |                                                            |          |
| 25 |                     |                     |                                                            |          |
| 26 |                     |                     |                                                            |          |
| 27 |                     |                     |                                                            |          |
| 28 | Roles and           | <a href="#">#5b</a> | Name and contact information for the trial sponsor         | 27       |
| 29 | responsibilities:   |                     |                                                            |          |
| 30 |                     |                     |                                                            |          |
| 31 | sponsor contact     |                     |                                                            |          |
| 32 |                     |                     |                                                            |          |
| 33 | information         |                     |                                                            |          |
| 34 |                     |                     |                                                            |          |
| 35 |                     |                     |                                                            |          |
| 36 |                     |                     |                                                            |          |
| 37 |                     |                     |                                                            |          |
| 38 | Roles and           | <a href="#">#5c</a> | Role of study sponsor and funders, if any, in study        | N/A      |
| 39 | responsibilities:   |                     | design; collection, management, analysis, and              |          |
| 40 |                     |                     | interpretation of data; writing of the report; and the     |          |
| 41 | sponsor and funder  |                     | decision to submit the report for publication, including   |          |
| 42 |                     |                     | whether they will have ultimate authority over any of      |          |
| 43 |                     |                     | these activities                                           |          |
| 44 |                     |                     |                                                            |          |
| 45 |                     |                     |                                                            |          |
| 46 |                     |                     |                                                            |          |
| 47 |                     |                     |                                                            |          |
| 48 |                     |                     |                                                            |          |
| 49 |                     |                     |                                                            |          |
| 50 |                     |                     |                                                            |          |
| 51 |                     |                     |                                                            |          |
| 52 | Roles and           | <a href="#">#5d</a> | Composition, roles, and responsibilities of the            | N/A      |
| 53 | responsibilities:   |                     | coordinating centre, steering committee, endpoint          |          |
| 54 |                     |                     | adjudication committee, data management team, and          |          |
| 55 | committees          |                     |                                                            |          |
| 56 |                     |                     |                                                            |          |
| 57 |                     |                     |                                                            |          |
| 58 |                     |                     |                                                            |          |
| 59 |                     |                     |                                                            |          |
| 60 |                     |                     |                                                            |          |

other individuals or groups overseeing the trial, if applicable (see Item 21a for data monitoring committee)

## Introduction

|                                                 |                     |                                                                                                                                                                                                            |             |
|-------------------------------------------------|---------------------|------------------------------------------------------------------------------------------------------------------------------------------------------------------------------------------------------------|-------------|
| Background and rationale                        | <a href="#">#6a</a> | Description of research question and justification for undertaking the trial, including summary of relevant studies (published and unpublished) examining benefits and harms for each intervention         | From page 4 |
| Background and rationale: choice of comparators | <a href="#">#6b</a> | Explanation for choice of comparators                                                                                                                                                                      | N/A         |
| Objectives                                      | <a href="#">#7</a>  | Specific objectives or hypotheses                                                                                                                                                                          | 6           |
| Trial design                                    | <a href="#">#8</a>  | Description of trial design including type of trial (eg, parallel group, crossover, factorial, single group), allocation ratio, and framework (eg, superiority, equivalence, non-inferiority, exploratory) | 7           |
| <b>Methods:</b>                                 |                     |                                                                                                                                                                                                            |             |
| Participants, interventions, and outcomes       |                     |                                                                                                                                                                                                            |             |
| Study setting                                   | <a href="#">#9</a>  | Description of study settings (eg, community clinic, academic hospital) and list of countries where data will be collected. Reference to where list of study sites can be obtained                         | 7 and 10    |

|    |                      |                      |                                                              |     |
|----|----------------------|----------------------|--------------------------------------------------------------|-----|
| 1  | Eligibility criteria | <a href="#">#10</a>  | Inclusion and exclusion criteria for participants. If        | 11  |
| 2  |                      |                      | applicable, eligibility criteria for study centres and       |     |
| 3  |                      |                      | individuals who will perform the interventions (eg,          |     |
| 4  |                      |                      | surgeons, psychotherapists)                                  |     |
| 5  |                      |                      |                                                              |     |
| 6  |                      |                      |                                                              |     |
| 7  |                      |                      |                                                              |     |
| 8  |                      |                      |                                                              |     |
| 9  |                      |                      |                                                              |     |
| 10 |                      |                      |                                                              |     |
| 11 | Interventions:       | <a href="#">#11a</a> | Interventions for each group with sufficient detail to allow | N/A |
| 12 |                      |                      | replication, including how and when they will be             |     |
| 13 | description          |                      | administered                                                 |     |
| 14 |                      |                      |                                                              |     |
| 15 |                      |                      |                                                              |     |
| 16 |                      |                      |                                                              |     |
| 17 |                      |                      |                                                              |     |
| 18 |                      |                      |                                                              |     |
| 19 | Interventions:       | <a href="#">#11b</a> | Criteria for discontinuing or modifying allocated            | N/A |
| 20 |                      |                      | interventions for a given trial participant (eg, drug dose   |     |
| 21 | modifications        |                      | change in response to harms, participant request, or         |     |
| 22 |                      |                      | improving / worsening disease)                               |     |
| 23 |                      |                      |                                                              |     |
| 24 |                      |                      |                                                              |     |
| 25 |                      |                      |                                                              |     |
| 26 |                      |                      |                                                              |     |
| 27 |                      |                      |                                                              |     |
| 28 |                      |                      |                                                              |     |
| 29 | Interventions:       | <a href="#">#11c</a> | Strategies to improve adherence to intervention              | N/A |
| 30 |                      |                      | protocols, and any procedures for monitoring adherence       |     |
| 31 | adherence            |                      | (eg, drug tablet return; laboratory tests)                   |     |
| 32 |                      |                      |                                                              |     |
| 33 |                      |                      |                                                              |     |
| 34 |                      |                      |                                                              |     |
| 35 |                      |                      |                                                              |     |
| 36 | Interventions:       | <a href="#">#11d</a> | Relevant concomitant care and interventions that are         | N/A |
| 37 |                      |                      | permitted or prohibited during the trial                     |     |
| 38 | concomitant care     |                      |                                                              |     |
| 39 |                      |                      |                                                              |     |
| 40 |                      |                      |                                                              |     |
| 41 |                      |                      |                                                              |     |
| 42 | Outcomes             | <a href="#">#12</a>  | Primary, secondary, and other outcomes, including the        | 7   |
| 43 |                      |                      | specific measurement variable (eg, systolic blood            |     |
| 44 |                      |                      | pressure), analysis metric (eg, change from baseline,        |     |
| 45 |                      |                      | final value, time to event), method of aggregation (eg,      |     |
| 46 |                      |                      | median, proportion), and time point for each outcome.        |     |
| 47 |                      |                      |                                                              |     |
| 48 |                      |                      |                                                              |     |
| 49 |                      |                      |                                                              |     |
| 50 |                      |                      |                                                              |     |
| 51 |                      |                      |                                                              |     |
| 52 |                      |                      |                                                              |     |
| 53 |                      |                      | Explanation of the clinical relevance of chosen efficacy     |     |
| 54 |                      |                      | and harm outcomes is strongly recommended                    |     |
| 55 |                      |                      |                                                              |     |
| 56 |                      |                      |                                                              |     |
| 57 |                      |                      |                                                              |     |
| 58 |                      |                      |                                                              |     |
| 59 |                      |                      |                                                              |     |
| 60 |                      |                      |                                                              |     |

|    |                           |                      |                                                           |     |
|----|---------------------------|----------------------|-----------------------------------------------------------|-----|
| 1  | Participant timeline      | <a href="#">#13</a>  | Time schedule of enrolment, interventions (including any  | 8   |
| 2  |                           |                      | run-ins and washouts), assessments, and visits for        |     |
| 3  |                           |                      | participants. A schematic diagram is highly               |     |
| 4  |                           |                      | recommended (see Figure)                                  |     |
| 5  |                           |                      |                                                           |     |
| 6  |                           |                      |                                                           |     |
| 7  |                           |                      |                                                           |     |
| 8  |                           |                      |                                                           |     |
| 9  |                           |                      |                                                           |     |
| 10 |                           |                      |                                                           |     |
| 11 | Sample size               | <a href="#">#14</a>  | Estimated number of participants needed to achieve        | 12  |
| 12 |                           |                      | study objectives and how it was determined, including     |     |
| 13 |                           |                      | clinical and statistical assumptions supporting any       |     |
| 14 |                           |                      | sample size calculations                                  |     |
| 15 |                           |                      |                                                           |     |
| 16 |                           |                      |                                                           |     |
| 17 |                           |                      |                                                           |     |
| 18 |                           |                      |                                                           |     |
| 19 |                           |                      |                                                           |     |
| 20 |                           |                      |                                                           |     |
| 21 | Recruitment               | <a href="#">#15</a>  | Strategies for achieving adequate participant enrolment   | 14  |
| 22 |                           |                      | to reach target sample size                               |     |
| 23 |                           |                      |                                                           |     |
| 24 |                           |                      |                                                           |     |
| 25 |                           |                      |                                                           |     |
| 26 | <b>Methods:</b>           |                      |                                                           |     |
| 27 |                           |                      |                                                           |     |
| 28 | <b>Assignment of</b>      |                      |                                                           |     |
| 29 | <b>interventions (for</b> |                      |                                                           |     |
| 30 | <b>controlled trials)</b> |                      |                                                           |     |
| 31 |                           |                      |                                                           |     |
| 32 |                           |                      |                                                           |     |
| 33 |                           |                      |                                                           |     |
| 34 |                           |                      |                                                           |     |
| 35 |                           |                      |                                                           |     |
| 36 | Allocation: sequence      | <a href="#">#16a</a> | Method of generating the allocation sequence (eg,         | N/A |
| 37 | generation                |                      | computer-generated random numbers), and list of any       |     |
| 38 |                           |                      | factors for stratification. To reduce predictability of a |     |
| 39 |                           |                      | random sequence, details of any planned restriction (eg,  |     |
| 40 |                           |                      | blocking) should be provided in a separate document that  |     |
| 41 |                           |                      | is unavailable to those who enrol participants or assign  |     |
| 42 |                           |                      | interventions                                             |     |
| 43 |                           |                      |                                                           |     |
| 44 |                           |                      |                                                           |     |
| 45 |                           |                      |                                                           |     |
| 46 |                           |                      |                                                           |     |
| 47 |                           |                      |                                                           |     |
| 48 |                           |                      |                                                           |     |
| 49 |                           |                      |                                                           |     |
| 50 |                           |                      |                                                           |     |
| 51 |                           |                      |                                                           |     |
| 52 |                           |                      |                                                           |     |
| 53 | Allocation                | <a href="#">#16b</a> | Mechanism of implementing the allocation sequence (eg,    | N/A |
| 54 | concealment               |                      | central telephone; sequentially numbered, opaque,         |     |
| 55 |                           |                      |                                                           |     |
| 56 |                           |                      |                                                           |     |
| 57 |                           |                      |                                                           |     |
| 58 | mechanism                 |                      |                                                           |     |
| 59 |                           |                      |                                                           |     |
| 60 |                           |                      |                                                           |     |

sealed envelopes), describing any steps to conceal the sequence until interventions are assigned

Allocation: [#16c](#) Who will generate the allocation sequence, who will enrol participants, and who will assign participants to interventions N/A

Blinding (masking) [#17a](#) Who will be blinded after assignment to interventions (eg, trial participants, care providers, outcome assessors, data analysts), and how N/A

Blinding (masking): [#17b](#) If blinded, circumstances under which unblinding is permissible, and procedure for revealing a participant's allocated intervention during the trial N/A

## Methods: Data

collection,

management, and

analysis

Data collection plan [#18a](#) Plans for assessment and collection of outcome, baseline, and other trial data, including any related processes to promote data quality (eg, duplicate measurements, training of assessors) and a description of study instruments (eg, questionnaires, laboratory tests) along with their reliability and validity, if known. Reference to where data collection forms can be found, if not in the protocol 15

|    |                            |                      |                                                             |         |
|----|----------------------------|----------------------|-------------------------------------------------------------|---------|
| 1  | Data collection plan:      | <a href="#">#18b</a> | Plans to promote participant retention and complete         | 15      |
| 2  |                            |                      |                                                             |         |
| 3  | retention                  |                      | follow-up, including list of any outcome data to be         |         |
| 4  |                            |                      | collected for participants who discontinue or deviate from  |         |
| 5  |                            |                      | intervention protocols                                      |         |
| 6  |                            |                      |                                                             |         |
| 7  |                            |                      |                                                             |         |
| 8  |                            |                      |                                                             |         |
| 9  |                            |                      |                                                             |         |
| 10 |                            |                      |                                                             |         |
| 11 | Data management            | <a href="#">#19</a>  | Plans for data entry, coding, security, and storage,        | N/A     |
| 12 |                            |                      | including any related processes to promote data quality     |         |
| 13 |                            |                      | (eg, double data entry; range checks for data values).      |         |
| 14 |                            |                      | Reference to where details of data management               |         |
| 15 |                            |                      | procedures can be found, if not in the protocol             |         |
| 16 |                            |                      |                                                             |         |
| 17 |                            |                      |                                                             |         |
| 18 |                            |                      |                                                             |         |
| 19 |                            |                      |                                                             |         |
| 20 |                            |                      |                                                             |         |
| 21 |                            |                      |                                                             |         |
| 22 |                            |                      |                                                             |         |
| 23 | Statistics: outcomes       | <a href="#">#20a</a> | Statistical methods for analysing primary and secondary     | 15      |
| 24 |                            |                      | outcomes. Reference to where other details of the           | onwards |
| 25 |                            |                      | statistical analysis plan can be found, if not in the       |         |
| 26 |                            |                      | protocol                                                    |         |
| 27 |                            |                      |                                                             |         |
| 28 |                            |                      |                                                             |         |
| 29 |                            |                      |                                                             |         |
| 30 |                            |                      |                                                             |         |
| 31 |                            |                      |                                                             |         |
| 32 |                            |                      |                                                             |         |
| 33 | Statistics: additional     | <a href="#">#20b</a> | Methods for any additional analyses (eg, subgroup and       | 15      |
| 34 | analyses                   |                      | adjusted analyses)                                          | onwards |
| 35 |                            |                      |                                                             |         |
| 36 |                            |                      |                                                             |         |
| 37 |                            |                      |                                                             |         |
| 38 |                            |                      |                                                             |         |
| 39 | Statistics: analysis       | <a href="#">#20c</a> | Definition of analysis population relating to protocol non- | 15      |
| 40 | population and             |                      | adherence (eg, as randomised analysis), and any             |         |
| 41 | missing data               |                      | statistical methods to handle missing data (eg, multiple    |         |
| 42 |                            |                      | imputation)                                                 |         |
| 43 |                            |                      |                                                             |         |
| 44 |                            |                      |                                                             |         |
| 45 |                            |                      |                                                             |         |
| 46 |                            |                      |                                                             |         |
| 47 |                            |                      |                                                             |         |
| 48 | <b>Methods: Monitoring</b> |                      |                                                             |         |
| 49 |                            |                      |                                                             |         |
| 50 |                            |                      |                                                             |         |
| 51 | Data monitoring:           | <a href="#">#21a</a> | Composition of data monitoring committee (DMC);             | N/A     |
| 52 | formal committee           |                      | summary of its role and reporting structure; statement of   |         |
| 53 |                            |                      | whether it is independent from the sponsor and              |         |
| 54 |                            |                      |                                                             |         |
| 55 |                            |                      |                                                             |         |
| 56 |                            |                      |                                                             |         |
| 57 |                            |                      |                                                             |         |
| 58 |                            |                      |                                                             |         |
| 59 |                            |                      |                                                             |         |
| 60 |                            |                      |                                                             |         |

competing interests; and reference to where further details about its charter can be found, if not in the protocol. Alternatively, an explanation of why a DMC is not needed

|    |                      |                      |                                                              |
|----|----------------------|----------------------|--------------------------------------------------------------|
| 1  |                      |                      |                                                              |
| 2  |                      |                      |                                                              |
| 3  |                      |                      |                                                              |
| 4  |                      |                      |                                                              |
| 5  |                      |                      |                                                              |
| 6  |                      |                      |                                                              |
| 7  |                      |                      |                                                              |
| 8  |                      |                      |                                                              |
| 9  |                      |                      |                                                              |
| 10 | Data monitoring:     | <a href="#">#21b</a> | Description of any interim analyses and stopping             |
| 11 |                      |                      |                                                              |
| 12 | interim analysis     |                      | guidelines, including who will have access to these          |
| 13 |                      |                      | interim results and make the final decision to terminate     |
| 14 |                      |                      | the trial                                                    |
| 15 |                      |                      |                                                              |
| 16 |                      |                      |                                                              |
| 17 |                      |                      |                                                              |
| 18 |                      |                      |                                                              |
| 19 |                      |                      |                                                              |
| 20 | Harms                | <a href="#">#22</a>  | Plans for collecting, assessing, reporting, and managing     |
| 21 |                      |                      | solicited and spontaneously reported adverse events and      |
| 22 |                      |                      | other unintended effects of trial interventions or trial     |
| 23 |                      |                      | conduct                                                      |
| 24 |                      |                      |                                                              |
| 25 |                      |                      |                                                              |
| 26 |                      |                      |                                                              |
| 27 |                      |                      |                                                              |
| 28 |                      |                      |                                                              |
| 29 |                      |                      |                                                              |
| 30 | Auditing             | <a href="#">#23</a>  | Frequency and procedures for auditing trial conduct, if      |
| 31 |                      |                      | any, and whether the process will be independent from        |
| 32 |                      |                      | investigators and the sponsor                                |
| 33 |                      |                      |                                                              |
| 34 |                      |                      |                                                              |
| 35 |                      |                      |                                                              |
| 36 |                      |                      |                                                              |
| 37 |                      |                      |                                                              |
| 38 | <b>Ethics and</b>    |                      |                                                              |
| 39 |                      |                      |                                                              |
| 40 | <b>dissemination</b> |                      |                                                              |
| 41 |                      |                      |                                                              |
| 42 |                      |                      |                                                              |
| 43 | Research ethics      | <a href="#">#24</a>  | Plans for seeking research ethics committee / institutional  |
| 44 |                      |                      | review board (REC / IRB) approval                            |
| 45 | approval             |                      |                                                              |
| 46 |                      |                      |                                                              |
| 47 |                      |                      |                                                              |
| 48 | Protocol             | <a href="#">#25</a>  | Plans for communicating important protocol modifications     |
| 49 |                      |                      | (eg, changes to eligibility criteria, outcomes, analyses) to |
| 50 | amendments           |                      | relevant parties (eg, investigators, REC / IRBs, trial       |
| 51 |                      |                      | participants, trial registries, journals, regulators)        |
| 52 |                      |                      |                                                              |
| 53 |                      |                      |                                                              |
| 54 |                      |                      |                                                              |
| 55 |                      |                      |                                                              |
| 56 |                      |                      |                                                              |
| 57 |                      |                      |                                                              |
| 58 |                      |                      |                                                              |
| 59 |                      |                      |                                                              |
| 60 |                      |                      |                                                              |

|    |                       |                      |                                                                |        |
|----|-----------------------|----------------------|----------------------------------------------------------------|--------|
| 1  | Consent or assent     | <a href="#">#26a</a> | Who will obtain informed consent or assent from potential      | 14 and |
| 2  |                       |                      | trial participants or authorised surrogates, and how (see      | 19     |
| 3  |                       |                      | Item 32)                                                       |        |
| 4  |                       |                      |                                                                |        |
| 5  |                       |                      |                                                                |        |
| 6  |                       |                      |                                                                |        |
| 7  |                       |                      |                                                                |        |
| 8  | Consent or assent:    | <a href="#">#26b</a> | Additional consent provisions for collection and use of        | N/A    |
| 9  | ancillary studies     |                      | participant data and biological specimens in ancillary         |        |
| 10 |                       |                      | studies, if applicable                                         |        |
| 11 |                       |                      |                                                                |        |
| 12 |                       |                      |                                                                |        |
| 13 |                       |                      |                                                                |        |
| 14 |                       |                      |                                                                |        |
| 15 |                       |                      |                                                                |        |
| 16 | Confidentiality       | <a href="#">#27</a>  | How personal information about potential and enrolled          | 14/15  |
| 17 |                       |                      | participants will be collected, shared, and maintained in      |        |
| 18 |                       |                      | order to protect confidentiality before, during, and after     |        |
| 19 |                       |                      | the trial                                                      |        |
| 20 |                       |                      |                                                                |        |
| 21 |                       |                      |                                                                |        |
| 22 |                       |                      |                                                                |        |
| 23 |                       |                      |                                                                |        |
| 24 |                       |                      |                                                                |        |
| 25 |                       |                      |                                                                |        |
| 26 | Declaration of        | <a href="#">#28</a>  | Financial and other competing interests for principal          | N/A    |
| 27 | interests             |                      | investigators for the overall trial and each study site        |        |
| 28 |                       |                      |                                                                |        |
| 29 |                       |                      |                                                                |        |
| 30 |                       |                      |                                                                |        |
| 31 | Data access           | <a href="#">#29</a>  | Statement of who will have access to the final trial           | 26     |
| 32 |                       |                      | dataset, and disclosure of contractual agreements that         |        |
| 33 |                       |                      | limit such access for investigators                            |        |
| 34 |                       |                      |                                                                |        |
| 35 |                       |                      |                                                                |        |
| 36 |                       |                      |                                                                |        |
| 37 |                       |                      |                                                                |        |
| 38 |                       |                      |                                                                |        |
| 39 | Ancillary and post    | <a href="#">#30</a>  | Provisions, if any, for ancillary and post-trial care, and for | N/A    |
| 40 | trial care            |                      | compensation to those who suffer harm from trial               |        |
| 41 |                       |                      | participation                                                  |        |
| 42 |                       |                      |                                                                |        |
| 43 |                       |                      |                                                                |        |
| 44 |                       |                      |                                                                |        |
| 45 |                       |                      |                                                                |        |
| 46 |                       |                      |                                                                |        |
| 47 | Dissemination policy: | <a href="#">#31a</a> | Plans for investigators and sponsor to communicate trial       | 21     |
| 48 | trial results         |                      | results to participants, healthcare professionals, the         |        |
| 49 |                       |                      | public, and other relevant groups (eg, via publication,        |        |
| 50 |                       |                      | reporting in results databases, or other data sharing          |        |
| 51 |                       |                      | arrangements), including any publication restrictions          |        |
| 52 |                       |                      |                                                                |        |
| 53 |                       |                      |                                                                |        |
| 54 |                       |                      |                                                                |        |
| 55 |                       |                      |                                                                |        |
| 56 |                       |                      |                                                                |        |
| 57 |                       |                      |                                                                |        |
| 58 |                       |                      |                                                                |        |
| 59 |                       |                      |                                                                |        |
| 60 |                       |                      |                                                                |        |



1 Dissemination policy: [#31b](#) Authorship eligibility guidelines and any intended use of N/A  
 2  
 3 authorship professional writers  
 4  
 5

6 Dissemination policy: [#31c](#) Plans, if any, for granting public access to the full N/A  
 7  
 8 reproducible protocol, participant-level dataset, and statistical code  
 9  
 10 research  
 11  
 12

## 13 Appendices

14  
 15  
 16  
 17 Informed consent [#32](#) Model consent form and other related documentation No  
 18  
 19 materials given to participants and authorised surrogates  
 20  
 21

22  
 23 Biological specimens [#33](#) Plans for collection, laboratory evaluation, and storage of N/A  
 24  
 25 biological specimens for genetic or molecular analysis in  
 26  
 27 the current trial and for future use in ancillary studies, if  
 28  
 29 applicable  
 30  
 31

32  
 33 None The SPIRIT checklist is distributed under the terms of the Creative Commons Attribution  
 34  
 35 License CC-BY-ND 3.0. This checklist can be completed online using <https://www.goodreports.org/>, a  
 36  
 37 tool made by the [EQUATOR Network](#) in collaboration with [Penelope.ai](#)  
 38  
 39  
 40  
 41  
 42  
 43  
 44  
 45  
 46  
 47  
 48  
 49  
 50  
 51  
 52  
 53  
 54  
 55  
 56  
 57  
 58  
 59  
 60

# BMJ Open

## Protocol for a multicentre longitudinal mixed methods study: Feeding and survivorship outcomes in previously healthy young Paediatric Intensive Care Survivors – The PIES study

|                                 |                                                                                                                                                                                                                                                                                                                   |
|---------------------------------|-------------------------------------------------------------------------------------------------------------------------------------------------------------------------------------------------------------------------------------------------------------------------------------------------------------------|
| Journal:                        | <i>BMJ Open</i>                                                                                                                                                                                                                                                                                                   |
| Manuscript ID                   | bmjopen-2020-041234.R1                                                                                                                                                                                                                                                                                            |
| Article Type:                   | Protocol                                                                                                                                                                                                                                                                                                          |
| Date Submitted by the Author:   | 22-Oct-2020                                                                                                                                                                                                                                                                                                       |
| Complete List of Authors:       | Morton, Kathryn; University Hospital Southampton NHS Foundation Trust, PICU; University of Southampton, School of Health Sciences Darlington, Anne-Sophie; University of Southampton, School of Health Sciences<br>Marino, LV; University Hospital Southampton NHS Foundation Trust, Department of Dietetics/SLT, |
| <b>Primary Subject Heading</b>: | Intensive care                                                                                                                                                                                                                                                                                                    |
| Secondary Subject Heading:      | Paediatrics, Nutrition and metabolism                                                                                                                                                                                                                                                                             |
| Keywords:                       | NUTRITION & DIETETICS, Paediatric intensive & critical care < ANAESTHETICS, PAEDIATRICS, Paediatric intensive & critical care < INTENSIVE & CRITICAL CARE, Paediatric intensive & critical care < PAEDIATRICS                                                                                                     |
|                                 |                                                                                                                                                                                                                                                                                                                   |

SCHOLARONE™  
Manuscripts



I, the Submitting Author has the right to grant and does grant on behalf of all authors of the Work (as defined in the below author licence), an exclusive licence and/or a non-exclusive licence for contributions from authors who are: i) UK Crown employees; ii) where BMJ has agreed a CC-BY licence shall apply, and/or iii) in accordance with the terms applicable for US Federal Government officers or employees acting as part of their official duties; on a worldwide, perpetual, irrevocable, royalty-free basis to BMJ Publishing Group Ltd ("BMJ") its licensees and where the relevant Journal is co-owned by BMJ to the co-owners of the Journal, to publish the Work in this journal and any other BMJ products and to exploit all rights, as set out in our [licence](#).

The Submitting Author accepts and understands that any supply made under these terms is made by BMJ to the Submitting Author unless you are acting as an employee on behalf of your employer or a postgraduate student of an affiliated institution which is paying any applicable article publishing charge ("APC") for Open Access articles. Where the Submitting Author wishes to make the Work available on an Open Access basis (and intends to pay the relevant APC), the terms of reuse of such Open Access shall be governed by a Creative Commons licence – details of these licences and which [Creative Commons](#) licence will apply to this Work are set out in our licence referred to above.

Other than as permitted in any relevant BMJ Author's Self Archiving Policies, I confirm this Work has not been accepted for publication elsewhere, is not being considered for publication elsewhere and does not duplicate material already published. I confirm all authors consent to publication of this Work and authorise the granting of this licence.

1 **Title:** Protocol for a multicentre longitudinal mixed methods study: Feeding and survivorship  
2 outcomes in previously healthy young Paediatric Intensive Care Survivors – The PIES study

3  
4  
5 **Authors:** Morton, K<sup>1,2</sup>, Darlington ASD<sup>2</sup>, Marino LV<sup>3,4</sup>

6 **Affiliations:**

7 Paediatric Intensive Care Unit, Southampton Children's Hospital<sup>1</sup>, School of Health Sciences,  
8 University of Southampton<sup>2</sup>, Department of Dietetics and Speech & Language Therapy,  
9 University Hospital Southampton NHS Foundation Trust<sup>3</sup>, NIHR Biomedical Research Centre  
10 Southampton, University Hospital Southampton NHS Foundation Trust<sup>4</sup>, United Kingdom.

11 **Author contact details:**

12 **Kathryn Morton;** Sister and Clinical Doctoral Research Fellow, Paediatric Intensive Care Unit,  
13 University Hospital Southampton NHS Foundation Trust, Southampton, UK S016 6YD Tel: + 44  
14 (0) 2381 206972 Email: [Kathryn.morton@uhs.nhs.uk](mailto:Kathryn.morton@uhs.nhs.uk)

15 **Anne-Sophie Darlington;** Professor of Child and Family Psychological Health, School of Health  
16 Sciences, University of Southampton, University Road, Southampton, SO17 1BJ. Email:  
17 [a.darlington@soton.ac.uk](mailto:a.darlington@soton.ac.uk)

18 **Luise Marino;** (PhD) Clinical Academic Paediatric Dietitian, Southampton Children's Hospital,  
19 University Hospital Southampton NHS Foundation Trust, Tremona Road, Southampton, SO16  
20 6YD. Email: [luise.marino@uhs.nhs.uk](mailto:luise.marino@uhs.nhs.uk)

21  
22 **Keywords:** feeding difficulties, children, critical illness, survivors

1  
2  
3  
4  
5  
6  
7  
8  
9  
10  
11  
12  
13  
14  
15  
16  
17  
18  
19  
20  
21  
22  
23  
24  
25  
26  
27  
28  
29  
30  
31  
32  
33  
34  
35  
36  
37  
38  
39  
40  
41  
42  
43  
44  
45  
46  
47  
48  
49  
50  
51  
52  
53  
54  
55  
56  
57  
58  
59  
60

24 **Corresponding author:** Kathryn Morton; Paediatric Intensive Care Unit, University Hospital  
25 Southampton NHS Foundation Trust, Southampton, UK S016 6YD Tel: + 44 (0) 2381 206972  
26 Email: [Kathryn.morton@uhs.nhs.uk](mailto:Kathryn.morton@uhs.nhs.uk)

For peer review only

## 29 **Abstract**

### 30 **Introduction**

31 An admission to Paediatric Intensive Care (PICU) is associated with multiple physical and  
32 environmental stressors, often involving many negative and painful oral experiences. Evidence  
33 from children with complex medical conditions suggest that feeding difficulties post-PICU stay  
34 are common, causing significant parental anxiety. Adult intensive care (ICU) survivor studies  
35 suggest feeding issues lasting up to 3 months post discharge from ICU. There is, however, a  
36 paucity of evidence regarding feeding outcomes for previously healthy children following a PICU  
37 admission and whether painful oral experiences during an admission contribute to feeding  
38 difficulties post-discharge, negatively impacting on parental/caregiver anxiety.

### 39 **Methods and analysis**

40 This longitudinal mixed method study will explore the impact of feeding difficulties,  
41 identifying any clinical risk factors during the first 6 months of PICU-discharge in previously  
42 healthy young children ( $\leq 4$  years). Parents/caregivers of children will be asked to complete  
43 questionnaires relating to; feeding difficulties, parental/caregiver stress, child and  
44 parental/caregivers feeding behaviours, at the point of PICU-discharge, 1, 3 and 6 months post-  
45 discharge. Parents/caregivers will be invited to participate in qualitative semi-structured  
46 interviews at 3 and 6 months post-PICU-discharge exploring parental/caregiver experiences of  
47 feeding their child after PICU. Statistical analysis of the survey data will consist of descriptive  
48 and inferential statistics, plus qualitative analysis of any free text comments using thematic  
49 analysis.

### 50 **Ethics and dissemination**

51 This study will provide an insight and increase our understanding of the prevalence of  
52 feeding difficulties in previously healthy children admitted to PICU and parental/caregiver

1  
2  
3  
4  
5  
6  
7  
8  
9  
10  
11  
12  
13  
14  
15  
16  
17  
18  
19  
20  
21  
22  
23  
24  
25  
26  
27  
28  
29  
30  
31  
32  
33  
34  
35  
36  
37  
38  
39  
40  
41  
42  
43  
44  
45  
46  
47  
48  
49  
50  
51  
52  
53  
54  
55  
56  
57  
58

53 experiences. Multiple methods will be used to ensure that the findings are effectively  
54 disseminated to service users, clinicians, policy and academic audiences. The study has full  
55 ethical approval from the National Health Service Research Ethics Committee (Ref: 20/YH/0160)  
56 and full governance clearance.

For peer review only

1  
2  
3 59 **Article summary**

4 60

5 61 **Strengths:**

- 6  
7  
8 62 • A strength of this study is that it is the first multicentre, longitudinal study to investigate  
9  
10 63 feeding and survivorship outcomes in young paediatric intensive care (PICU) survivors, in the  
11  
12 64 first 6-months post-discharge.  
13  
14 65 • By using a mixed methods design, this study will provide a greater breadth of understanding  
15  
16 66 into the prevalence and impact of feeding issues in previously healthy young children who  
17  
18 67 survive PICU.  
19  
20  
21 68 • A strength of this study's qualitative data collection method (interviews with  
22  
23 69 parents/caregivers) lies in its ability to generate a rich narrative data set exploring the  
24  
25 70 survivorship journey of families post-PICU.  
26  
27  
28 71 • The longitudinal study design will allow us to explore any feeding difficulties over a 6-month  
29  
30 72 period post-PICU, potentially identifying transient and persistent problems.  
31  
32

33 73 **Limitations:**

- 34  
35  
36  
37 74 • A limitation to the study's longitudinal design lies in its potential for high attrition which  
38  
39 75 may affect data at six months, challenging the internal validity of the reported results.  
40  
41  
42 76



## 77 Introduction

78 Paediatric intensive care unit (PICU) admissions have increased by 15% over the last  
79 decade,(1, 2). Approximately 70% are admitted due to emergency unplanned admissions,(2)  
80 causing a period of distress and crisis for families,(3). In developed countries, advances in  
81 medical care and technology mean that over 96% of PICU patients are discharged alive,(4)  
82 although morbidity amongst childhood survivors is high ,(5). As a result, the focus of critical care  
83 has moved to improving survivorship, aiming to optimise physical, social, emotional, cognitive  
84 and functional outcomes for children and their families,(6).

85 Until now, there has been little focus on the impact an admission to PICU may have on  
86 oral feeding ability in survivors of critical illness. During an admission to PICU, children are  
87 exposed to multiple physical and environmental stressors, involving up to 89 painful oral  
88 experiences, including the use of endotracheal tubes (ETT), extubations and re-intubations,  
89 nasogastric tube (NGT) insertion and frequent oral suctioning,(7). These traumatic and often  
90 painful oral experiences have been linked to swallowing and eating difficulties in adult survivors  
91 of intensive care ,(8-12) with difficulties in self-feeding, reduced appetite, altered taste and food  
92 preferences lasting up to three months post ICU discharge,(12, 13).

93 Despite most PICUs in the United Kingdom (UK) incorporating early nutritional support  
94 within 24 hours of admission (14, 15), it is usual for children not to eat or drink orally during  
95 their intensive care admission,(16). Nasogastric tube feeding is routinely used during critical  
96 illness as a primary method of delivering nutrition support (16), resulting in young children  
97 missing out on normal oral feeding experiences,(17, 18). The impact of prolonged NGT feeding is  
98 well described, with evidence indicating that children under 1-year-of age can take up to 2 years  
99 to establish oral feeding if they are NGT fed for significant periods of time,(19, 20).

1  
2  
3 100 Feeding is a complex learned behaviour, occurring during infancy involving  
4  
5 101 developmental maturation to coordinate the process of sucking, swallowing and breathing. This  
6  
7 102 then advances into chewing and texture control, (21). There is also a social aspect of feeding,  
8  
9 103 involving parental - child interactions,(22) with parental behaviours and feeding styles directly  
10  
11 104 influencing feeding behaviours of young children,(20, 23). Parental feeding styles have been  
12  
13 105 shown to influence food enjoyment, fussiness, food responsiveness, food neophobia, and self-  
14  
15 106 regulation in children,(22). Parental feeding interactions and practices during childhood cancer  
16  
17 107 treatment, for example, include pressurising children to eat, using food as rewards and bribes  
18  
19 108 and being overindulgent, with the stress of eating having a negative effect on the parental-child  
20  
21 109 relationship (3, 24). There is, however, no evidence looking at feeding difficulties and parental-  
22  
23 110 child feeding interactions associated with feeding in the previously healthy PICU population (25).  
24  
25  
26  
27 111 Although there is some information describing feeding outcomes in children born prematurely  
28  
29 112 and young children with CHD, there remains a lack of high-quality evidence. The consequence of  
30  
31 113 an admission to PICU on the ability of young children to eat and drink initially after PICU  
32  
33 114 discharge and then once home, and the implications this has for young children and their  
34  
35 115 families, is not known.  
36  
37  
38  
39  
40

## 41 117 **Methods and analysis**

### 42 118 **Study aims**

43  
44  
45 119 The PIES study (Feeding and survivorship outcomes in previously healthy young  
46  
47 120 Paediatric Intensive Care Survivors) has six specific objectives:  
48  
49  
50 121 1. To characterise and measure the prevalence of feeding difficulties in previously healthy  
51  
52 122 children ( $\leq 4$  years) who survive critical illness during the first 6 months after PICU  
53  
54 123 discharge;  
55  
56  
57  
58  
59  
60

- 1  
2  
3 124 2. To identify clinical predictors for the development of feeding difficulties in previously  
4  
5 125 healthy young children ( $\leq 4$  years) who survive critical illness;  
6  
7 126 3. To identify parental/caregiver feeding styles for previously healthy young children ( $\leq 4$   
8  
9 127 years) who survive critical illness;  
10  
11 128 4. To measure parental stress in parents/caregivers of previously healthy young children ( $\leq$   
12  
13 129 4 years) who survive critical illness;  
14  
15 130 5. To identify behaviours of previously healthy young children ( $\leq 4$  years) who survive  
16  
17 131 critical illness;  
18  
19 132 6. To develop an in-depth understanding of how parents/caregivers of previously healthy  
20  
21 133 young children ( $\leq 4$  years old) who survive critical illness construct, experience and make  
22  
23 134 sense of their survivorship journey from PICU admission, specifically looking at feeding  
24  
25 135 experiences and parental-child relationships.  
26  
27  
28  
29

### 30 **Study design**

31  
32 137 Based on the research question and objectives, a prospective, longitudinal mixed  
33  
34 138 methods design will be used. Quantitative and qualitative data will be collected simultaneously  
35  
36 139 over several times points, analysed separately and then integrated giving equal emphasis to  
37  
38 140 each strand,(26). Parents/caregivers of children will be asked to take part in a longitudinal  
39  
40 141 survey, completing questionnaires considering aspects relating to; feeding difficulties,  
41  
42 142 parental/caregiver stress, child and parental/caregivers feeding behaviours at the point of PICU-  
43  
44 143 discharge and at 1, 3 and 6 months post-discharge. Parents/caregivers will also be invited to  
45  
46 144 participate in qualitative semi-structured interviews at 3 and 6 months post-PICU-discharge,  
47  
48 145 which will explore parental/caregiver experiences of feeding their child post-PICU. Routinely  
49  
50 146 collected clinical data about the PICU admission will additionally be collected. See figure 1 for  
51  
52 147 schematic overview of the study design.  
53  
54  
55  
56  
57  
58  
59  
60

148 **Setting**

149 Participants will be recruited from up to ten PICUs across the United Kingdom chosen to  
 150 include variation in unit size, case mix, geographical location and patient demographic.

151 **Sample and recruitment**152 **Eligibility criteria**

153 The chosen inclusion criteria will allow recruitment of previously healthy young children  
 154 ( $\leq 4$  years) who are admitted to PICU both electively and in emergency situations. Participants  
 155 will be eligible if they are parents/caregivers (aged  $\geq 18$  years of age) of a previously healthy  
 156 child aged  $\leq 4$  years who has received invasive ventilation for 48 hours or more (including at  
 157 referring hospital if applicable) (Table 1).

158 **Table 1: Eligibility criteria**

| Inclusion criteria                                                                                                                                        | Rationale                                                                                                                                                            |
|-----------------------------------------------------------------------------------------------------------------------------------------------------------|----------------------------------------------------------------------------------------------------------------------------------------------------------------------|
| Parents/caregivers (aged $\geq 18$ years of age) of<br><b>previously healthy children</b> aged $\leq 4$ years<br>who are ready to be discharged from PICU | Age limit required to comply with the<br>Research Governance Framework for Health<br>and Social Care (27)                                                            |
| Parents/caregivers who have sufficient<br>language skills to read the Participant<br>Information Sheet and to complete the<br>questionnaires in English   | Unable to translate study materials into<br>different languages due to limited study<br>resources                                                                    |
| Children are included if they: <ul style="list-style-type: none"> <li>• Are <math>\leq 4</math> years;</li> </ul>                                         | To cover children up to school age.<br>Used as an indicator of critical illness and<br>seen in adult ICU survivors to affect<br>swallowing and feeding problems(10). |

| <ul style="list-style-type: none"> <li>• Have received invasive ventilation for 48 hours or more (including at referring hospital if applicable)</li> </ul>    |                                                                                       |
|----------------------------------------------------------------------------------------------------------------------------------------------------------------|---------------------------------------------------------------------------------------|
| Exclusion criteria                                                                                                                                             | Rationale                                                                             |
| Aged >5 years or older                                                                                                                                         | Age beyond preschool years                                                            |
| Children not invasively ventilated (so no ETT)                                                                                                                 | Unable to fulfil inclusion criteria                                                   |
| Children with previous feeding difficulties (children who were <b>not</b> fully orally fed prior to PICU admission or have document oral feeding difficulties) | Unable to fulfil inclusion criteria and unable to consume sufficient nutrients orally |

159

160 A limit of  $\leq 4$  year of age has been set because the majority of children admitted to PICU are  
 161 under school age, with children under 5 years of age spending the most number of days in  
 162 PICU,(4). Furthermore, the skills and behaviours learnt in the first few years of life are seen as  
 163 imperative for future eating skills, attitudes and behaviours needed for future adult health,(28).  
 164 Additionally, by studying this age range, any feeding difficulties that may occur during critical  
 165 time-sensitive developmental feeding milestone windows, may also be identified,(29). These  
 166 include:

- 167 • The initial feeding skill that is required to successfully breast or bottle feed at  
 168 birth;
- 169 • To identify feeding difficulties that might occur during the weaning to  
 170 complementary food stage (4 to 6 months of age), for example involving problems with  
 171 textures, tastes, and chewing;

- 1  
2  
3 172 • To identify feeding difficulties that might occur during the transition to  
4  
5 173 autonomous child self-feeding during pre-school years;  
6  
7 174 • To identify extreme cases of behaviour often associated with picky or fussy  
8  
9 175 behaviour in preschool aged children.  
10  
11 176 • Once children start school (> 4 years of age), parents often have less control  
12  
13 177 over lunchtime behaviours and food intake, (30).  
14  
15

16 178 The exclusion of non-English speaking families is a limitation of the study design in terms of  
17  
18 179 selection bias and may affect the generalisability of the results. This will be investigated in the  
19  
20 180 interpretations of the study results and implications for clinical practice.  
21  
22

### 23 181 **Sample size**

24  
25 182 Quantitative study: The sample size is based on estimating prevalence to a certain level  
26  
27 183 of precision as defined by a 95% confidence interval. Assuming a potentially low prevalence of  
28  
29 184 just 20% (which is less than the NICU and CHD population owing to their underlying baseline  
30  
31 185 disease,(31-35)), a sample size of 204 child participants would be sufficient to estimate feeding  
32  
33 186 difficulty prevalence. Anticipating a 40% drop-out, as often seen with online surveys,(36, 37), an  
34  
35 187 initial recruitment of 340 participants is required. We anticipate enrolling those participants  
36  
37 188 from 10 PICUs over a 12-month period. It is expected that recruitment numbers will vary across  
38  
39 189 the sites and across the recruitment period, accounting for seasonal admissions involving  
40  
41 190 healthy children being admitted for bronchiolitis and other respiratory and/or septic illness in  
42  
43 191 the winter months. Recruitment targets will be discussed at each site set up, with the allowance  
44  
45 192 of over-recruiting in larger sites where possible.  
46  
47

48  
49 193 Qualitative study: A realistic and pragmatic sample size of 15 to 20 parents/caregivers  
50  
51 194 will be interviewed at 3 and 6 months after PICU discharge, with the aim of increasing research  
52  
53 195 knowledge in this unknown field. We recognise that we may not achieve data saturation with  
54  
55  
56  
57  
58  
59  
60

196 this sample size, as there are many different influences and variables surrounding the child's  
 197 PICU admission, parent/caregivers feeding experiences and survivorship journeys. However, this  
 198 limitation will be acknowledged, investigated and discussed in the data analysis and future  
 199 reporting of any study results, including the impact this may have on the study's credibility and  
 200 generalisability.

### 201 **Sampling strategy**

202 Quantitative study: Initially, convenience sampling will be used to identify and recruit  
 203 previously healthy children aged  $\geq 37$  weeks gestational age and  $\leq 4$  years who have survived an  
 204 admission to PICU and their parents/caregivers. During the recruitment period, monthly  
 205 progress will be monitored by the lead researcher (KM) and a proportional quota sampling  
 206 strategy will be used to recruit a sample representative to the UK PICU population in terms of  
 207 age. Recruitment strategies will be employed against the population strata taken from annual  
 208 UK PICU admission data,(4) (Table 2). To increase our understanding of the experiences that  
 209 both fathers and mothers have after their child has survived intensive care, we are encouraging  
 210 both fathers and mothers to complete the parental questionnaires where possible.

212 **Table 2: Proportional quota sampling strategy**

| Strata (age)      | UK PICU population | Pro-rata         | Quota sample      |
|-------------------|--------------------|------------------|-------------------|
| Less than 1 year  | 45%                | 153              | 217               |
| 1 year old        | 11%                | 37               | 53                |
| 2 years old       | 6%                 | 20               | 28                |
| 3 and 4 years old | 9%                 | 30               | 42                |
| <b>Total</b>      | <b>70%</b>         | <b>240 (70%)</b> | <b>340 (100%)</b> |

213

214 Qualitative study: A purposeful sampling strategy will be used to interview a range of  
 215 parents/caregivers based on reason for admission, age of child admitted to PICU and gender of  
 216 parent (Table 3). This will ensure that not just mothers, or parents/caregivers of planned surgery  
 217 or parents/caregivers of babies are only interviewed, for example.

218 **Table 3: Sampling framework for interviews**

| Inclusion criteria                                                                                                                                                                                          | Rationale                                                                                                                                                                                                           |
|-------------------------------------------------------------------------------------------------------------------------------------------------------------------------------------------------------------|---------------------------------------------------------------------------------------------------------------------------------------------------------------------------------------------------------------------|
| Parents/caregivers of children enrolled into<br>The PIES Study                                                                                                                                              | To be able to compare experiences with<br>quantitative data from the survey                                                                                                                                         |
| Mothers and fathers                                                                                                                                                                                         | To obtain experiences of both mothers and<br>fathers                                                                                                                                                                |
| Emergency and planned admission                                                                                                                                                                             | To obtain experiences of parents/caregivers<br>dealing with both planned and emergency<br>admission as there is often psychological<br>sequelae associated with emergency verses<br>planned admissions to PICU (38) |
| Age of child: <ul style="list-style-type: none"> <li>• ≤ 6 months (or pre-weaned babies)</li> <li>• &gt; 6 months to 1 year</li> <li>• &gt; 1 year to 2 years</li> <li>• &gt; 2 years to 4 years</li> </ul> | To obtain differing experiences of feeding<br>during significant developmental feeding<br>milestones for example weaning verses<br>autonomous child self-feeding during pre-<br>school years (39)                   |

219

## 220 Study Measures

### 221 Longitudinal follow-up survey



1  
2  
3 222 The outcome measures for the longitudinal follow-up survey have been selected based  
4  
5 223 on their validity, reliability, use in previous paediatric populations and ease of use for  
6  
7 224 participants. Pre-existing validated questionnaires will be used to measure feeding difficulty  
8  
9 225 assessment, parental stress, parental feeding styles and child behaviour. To obtain longitudinal  
10  
11 226 outcome data and potentially identify acute and/or chronic feeding difficulties, data from the  
12  
13 227 questionnaires will be collected at four-time points: at PICU discharge (retrospective data), 1, 3  
14  
15 228 and 6 months after PICU discharge. The outcomes measures and time points are outlined in  
16  
17 229 Table 4. The questionnaires have also been selected according to age of the child participant, in  
18  
19 230 addition to tested psychometric properties.  
20  
21  
22  
23

24 231 Feeding difficulty assessment measures:

- 25  
26  
27 232 • Infant feeding questionnaire,(40) (7 items; up to 9 month old babies)  
28  
29 233 • Behavioral Pediatric Feeding Assessment Scale,(41) (35 items; 9 months old to 7 years).  
30  
31

32 234 Parental stress measure:

- 33  
34  
35 235 • Parental Stress Scale,(42) (18 items).  
36  
37

38 236 Parental feeding style measures:

- 39  
40  
41 237 • Infant feeding questionnaire,(43) (25 items; up to 2 years)  
42  
43 238 • Child feeding questionnaire,(44) (28 items; from 2 years onwards).  
44  
45

46 239 Child behaviour measures

- 47  
48  
49 240 • Infant behaviour questionnaire – very short version,(45) (36 items; up to 12 months)  
50  
51 241 • Child behaviour questionnaire – very short version, (46) (35 items; from 1 year)  
52  
53

54 242 **Demographic Information:**  
55  
56  
57  
58  
59  
60

1  
2  
3 243 At each survey, parental factors, family variables and socio-economic data will be  
4  
5 244 collected to identify any relationship between family background and the development of  
6  
7 245 feeding difficulties for young survivors of critical illness. This includes parental/caregiver:

- 10 246
- Ethnic origin
- 13 247
- Age
- 16 248
- Gender
- 19 249
- Highest level of education
- 22 250
- Living situation
- 25 251
- Employment status
- 28 252
- Siblings in household.

31 253 **Routinely collected clinical PICU data:**

34 254 For all recruited patients, data already recorded during the child's PICU admission will  
35  
36 255 be captured on a paper or electronic Case Report Form completed by the RC research nurse,  
37  
38 256 a clinical team member delegated by the local PI or by the Chief Investigator at a later date.

40  
41 257 The variables of interest have been identified as:

- 43 258
- Length of PICU stay (in hours)
- 46 259
- Length of intubation (in hours)
- 49 260
- Length of mechanical invasive ventilation (in hours)
- 52 261
- Number of (re) intubations
- 55 262
- Type of ETT (oral or nasal)

- 1  
2  
3 263 • Length of non-invasive ventilation (in hours and mode)  
4  
5  
6 264 • Inotrope requirement (yes/no)  
7  
8  
9 265 • Mode of feeding during PICU admission (enteral, bolus or continuous, parental  
10  
11 266 nutrition, oral diet, location of feeding tube)  
12  
13  
14 267 • Time from extubation to commence oral feeding (in hours)  
15  
16  
17 268 • Mode of feeding at PICU discharge  
18  
19  
20 269 • Documented evidence of gastric intolerance (vomiting, diarrhea, abdominal  
21  
22 270 distention).  
23  
24  
25 271  
26  
27  
28 272

**Table 4: Data collection measures and time points**

| Timepoint                                                                      | Baseline<br>(retrospective<br>data) | 1 month<br>(after<br>PICU<br>discharge) | 3 months<br>(after PICU<br>discharge) | 6 months<br>(after PICU<br>discharge) |
|--------------------------------------------------------------------------------|-------------------------------------|-----------------------------------------|---------------------------------------|---------------------------------------|
| Enrolment:                                                                     |                                     |                                         |                                       |                                       |
| Eligibility screening<br>(daily)                                               | <b>X</b>                            |                                         |                                       |                                       |
| Recruitment                                                                    | <b>X</b>                            |                                         |                                       |                                       |
| Assessments:                                                                   |                                     |                                         |                                       |                                       |
| Demographic<br>information                                                     | <b>X</b>                            |                                         |                                       |                                       |
| Routinely collected<br>clinical PICU data                                      | <b>X</b>                            |                                         |                                       |                                       |
| Parental/caregivers<br>reports of feeding history<br>(prior to PICU admission) | <b>X</b>                            |                                         |                                       |                                       |

|                                                                                                           |   |   |   |   |
|-----------------------------------------------------------------------------------------------------------|---|---|---|---|
| Feeding difficulty assessment measures                                                                    |   |   |   |   |
| Infant Feeding Questionnaire<br><i>or</i><br>Behavioral Pediatric Feeding Assessment Scale                | X | X | X | X |
| Parental stress measure                                                                                   |   |   |   |   |
| Parental Stress Scale                                                                                     | X | X | X | X |
| Parental feeding style measures                                                                           |   |   |   |   |
| Infant Feeding Questionnaire<br><i>or</i><br>Child Feeding Questionnaire                                  | X | X | X | X |
| Child behaviour measures                                                                                  |   |   |   |   |
| Infant Behavior Questionnaire (very-short version)<br><i>or</i><br>Early Childhood Behavior Questionnaire | X | X | X | X |
| Qualitative interviews:                                                                                   |   |   |   |   |
| Invitation                                                                                                | X |   |   |   |
| Interviews                                                                                                |   |   | X | X |

273

274 **Qualitative study**

1  
2  
3 275 The main aim of the semi-structured qualitative interviews are to develop an in-depth  
4  
5 276 understanding of how parents/caregivers of previously healthy young children ( $\leq 4$  years old)  
6  
7 277 who survive critical illness construct, experience and make sense of their survivorship journey  
8  
9  
10 278 from PICU admission, specifically looking at feeding experiences and parental-child behaviours.  
11  
12 279 Parents will be interviewed at approximately 3 and 6 months post-PICU discharge so that they  
13  
14 280 can describe how and/or if their experiences are changing (or have changed) along the PICU  
15  
16 281 survivorship journey.  
17  
18  
19 282

### 21 283 **Study procedures**

22  
23 284 Quantitative study: Over a 12-month period, each site will screen all children admitted  
24  
25 285 to PICU and invite all eligible children and their parents/caregivers to participate in the study.  
26  
27 286 Site investigators (or their designated nominee) who are part of the PICU clinical care team will  
28  
29 287 determine eligibility. Parents/caregivers could be approached to take part in the study when the  
30  
31 288 child is still in PICU, near to or at discharge, on the High Dependency Unit or hospital ward soon  
32  
33 289 after being discharged from PICU. Once informed consent has been obtained,  
34  
35 290 parents/caregivers will be asked to complete baseline questionnaires (paper or online options  
36  
37 291 available). Parent/caregiver contact details will be obtained and securely recorded on a  
38  
39 292 password protected database to enable follow-up survey distribution at 1, 3 and 6 months.  
40  
41 293 Follow-up survey data will be collected using either online or paper questionnaires as agreed by  
42  
43 294 the parents/caregivers at recruitment. Two fortnightly reminders will be sent for the follow-up  
44  
45 295 surveys as reminder letters, telephone calls, messages or email by the lead researcher (KM) as  
46  
47 296 agreed with the participant at recruitment. As there is such a small-time frame between 1 and 3  
48  
49 297 month assessments, if no response is received following the 1-month survey, participants will  
50  
51  
52  
53  
54  
55  
56  
57  
58  
59  
60

1  
2  
3 298 still be approached at 3 months. If there is no response at this point however, they will not be  
4  
5 299 approached again at 6 months.

6  
7 300 *Qualitative study:* During recruitment into the multicentred survey, parents/caregivers  
8  
9 301 will be invited to take part in the qualitative interviews. Those who consent to an interview will  
10  
11 302 be approached by the lead researcher (KM) at the time in which reminders of the follow-up  
12  
13 303 survey are sent (at 1, 3 and 6 months) either by reminder letters, telephone call, messages or  
14  
15 304 email as agreed at recruitment. Semi-structured open-ended questions will be used as the  
16  
17 305 primary method of data collection to allow the parent/caregiver to describe their story,  
18  
19 306 communicate their experiences, feelings and PICU survivorship journey. In response to PPI  
20  
21 307 feedback highlighting the lack of spare time that parents/caregivers of young children often  
22  
23 308 face, telephone and internet (i.e. Microsoft teams: Microsoft 365, UK) interviews will be  
24  
25 309 conducted at a time convenient for the parent/caregiver which could include evenings and  
26  
27 310 weekends.

## 311 312 **Data analysis**

313 All data obtained will be analysed. In circumstances where participants are deemed lost  
314 to follow-up, any data supplied will be analysed and used where appropriate, even if it can only  
315 be used to describe the cohort at baseline. A pragmatic approach to missing data will be used,  
316 whereby data will be analysed as much as possible. Data from non-responders will be used  
317 within the analysis to observe for nonresponse bias.

## 318 **Quantitative study data analysis**

319 Descriptive statistics will be used to present the demographic data information taken  
320 from the routinely collected clinical PICU data. All child and parent/caregiver outcome measures  
321 will be calculated, including means, SD, medians and IQRs for continuous variables and

1  
2  
3 322 frequency counts and percentages for categorical data. Data will be examined for normality,  
4  
5 323 outliers and for missing data. Statistical analysis will be completed using the IBM Statistical  
6  
7 324 Package for Social Science (SPSS) and statistical significance will be set at  $p < 0.05$ .

8  
9  
10 325 Analyses related to the study specific objectives include the following:

11  
12 326 *Objective 1: To characterise and measure the prevalence of feeding difficulties in*  
13  
14 327 *previously healthy children ( $\leq 4$  years) who survive critical illness during the first 6 months after*  
15  
16 328 *PICU discharge. From the feeding difficulty assessment measures, descriptive statistics*  
17  
18 329 *(frequency counts and percentages) will be used to identify the numbers and types of feeding*  
19  
20 330 *difficulties at each time point collected and for different age groups.*

21  
22  
23 331 *Objective 2: To identify clinical predictors for the development of feeding difficulties in*  
24  
25 332 *previously healthy young children ( $\leq 4$  years) who survive critical illness. The information from*  
26  
27 333 *the routinely collected clinical PICU data will be used to identify any clinical predictors for the*  
28  
29 334 *development of feeding difficulties, such as length of intubation and time to commence oral*  
30  
31 335 *feeding. Statistical analysis will involve multiple +/- linear regressions to see if we can predict*  
32  
33 336 *feeding difficulty questionnaire scores from the clinical variables.*

34  
35  
36  
37 337 *Objective 3: To identify parental/caregiver feeding styles for previously healthy young*  
38  
39 338 *children ( $\leq 4$  years) who survive critical illness. Descriptive statistics will be initially performed to*  
40  
41 339 *identify the frequency of participants in each parental feeding style, to identify the majority.*  
42  
43 340 *This will then be repeated at each time point collected, to identify a change (or not) in parental*  
44  
45 341 *feeding style across the 6 months from PICU discharge. If have enough data, differences*  
46  
47 342 *between mother feeding styles and father feeding styles will be calculated using Mann-Whitney*  
48  
49 343 *U (non- parametric) or t-Test (parametric) tests as appropriate. The relationship between*  
50  
51 344 *parental feeding style and feeding difficulty score will also be tested using the same statistical*  
52  
53 345 *tests.*

1  
2  
3 346 *Objective 4: To measure parental stress in parents/caregivers of previously healthy*  
4  
5 347 *young children ( $\leq 4$  years) who survive critical illness. Using the scores from the parental stress*  
6  
7 348 *scale, average parental stress scores for all participants will be calculated at all time points.*  
8  
9 349 *Average parental stress score at each time point, for those parents of children with and without*  
10  
11 350 *feeding difficulties, will also be presented to identify the trajectories of parental stress over time*  
12  
13 351 *and between the two groups. Correlation and regression analysis will be used to investigate*  
14  
15 352 *relationships between increasing feeding difficulty score and increasing parental stress score*

16  
17 353 *Objective 5: To identify behaviours of previously healthy young children ( $\leq 4$  years) who*  
18  
19 354 *survive critical illness. Frequency of children in each temperament category from the Infant and*  
20  
21 355 *Early Child Behavior questionnaires will be calculated and presented at each data collection time*  
22  
23 356 *point, so observe for changes over time. The relationship between infant/child temperament*  
24  
25 357 *and feeding difficulty score; and parental feeding style and parental stress score will be assessed*  
26  
27 358 *using Mann-Whitney U (non- parametric) or t-Test (parametric) and regression models where*  
28  
29 359 *appropriate.*

### 30 360 **Qualitative study data analysis**

31  
32 361 *All interviews will be audio-recorded and transcribed verbatim. All data will be imported*  
33  
34 362 *into a qualitative data analysis package (NVivo), which will assist in managing, sorting and coding*  
35  
36 363 *the vast data set. Data analysis will be largely conducted by KM, with the other researchers*  
37  
38 364 *(ASD, LVM) verifying the findings for consistencies and discrepancies to maximise credibility and*  
39  
40 365 *reliability,(47). Data analysis will involve three stages:1) narrative analysis, 2) thematic analysis*  
41  
42 366 *and 3) integration and will look to answer study objective 6: To develop an in-depth*  
43  
44 367 *understanding of how parents/caregivers of previously healthy young children ( $\leq 4$  years old)*  
45  
46 368 *who survive critical illness construct, experience and make sense of their survivorship journey*  
47  
48 369 *from PICU admission, specifically looking at feeding experiences and parental-child relationships.*



370

371 Stage 1: Narrative analysis: The first stage of analysis will involve analysing the content  
372 of the data from each participant's interview using the Clandinin and Connelly's (48) method of  
373 narrative inquiry. This framework uses three domains to structure the analysis: temporality,  
374 sociality and place,(49). The analysis focuses on the actual storylines that are told and emotions  
375 that are used to tell the story, the societal and cultural impact on the story and the influence of  
376 the place in which the experience occurs,(48). An additional consideration of the actual words  
377 and language, both verbal and nonverbal, used throughout the narrative will also be used during  
378 the analysis,(48).

379 Stage 2: Thematic analysis: The second stage of analysis will involve a thematic analysis  
380 approach, whereby repeated patterns across the stage 1 analysis will be identified, leading to  
381 the detection of codes and themes across the entire data set,(50). This will enable meaning and  
382 patterns to emerge from the data.

383 Stage 3: Data integration: The final step of the qualitative data analysis will involve  
384 integrating the narrative and thematic analysis. The individual stories will be re-told in a  
385 coherent manner and then the key themes across the entire data set will be presented. This will  
386 provide a detailed description and understanding of the survivorship journey of  
387 parents/caregivers of previously health children who survive critical illness.

388

### 389 **Data integration strategy of quantitative and qualitative data**

390 The quantitative data from the survey and the qualitative data from the interviews will  
391 be analysed concurrently as they are collected and then integrated to answer the overarching  
392 research questions and aims. The qualitative data will strengthen the survey findings by adding  
393 the human perspective, exploring behaviour, feelings and experiences of the parents/caregivers

1  
2  
3 394 told by them,(51). The information gained from the interviews will assist interpretation and  
4  
5 395 analysis of the survey results, drawing conclusions to the clinical significance of the results with  
6  
7 396 implications for clinical practice,(52).  
8  
9

10 397

## 11 398 **Public and patient involvement**

12  
13  
14 399 Guided by the NIHR INVOLVE recommendations,(53), involvement of families of children  
15  
16 400 recently discharged from PICU was sought during the study design process. Six parents  
17  
18 401 volunteered to provide guidance and advice during an organised coffee morning. Collectively,  
19  
20 402 the importance of the study was recognised, and recommendations made to the recruitment  
21  
22 403 process and data collection methods. Feedback included using an online questionnaire for ease  
23  
24 404 of use and to increase follow-up completion. The survey questions were also piloted by parents,  
25  
26 405 assessing the clarity of the questionnaires and their instructions and to consider the burden of  
27  
28 406 completing all four questionnaires. Offering home, telephone and internet interviews was also  
29  
30 407 suggested for the interviews.  
31  
32  
33

34 408

## 35 409 **Ethics and Dissemination**

### 36 410 **Informed consent**

37  
38  
39 411 Parents/caregivers will be approached to take part in The PIES study once the child  
40  
41 412 meets the inclusion/exclusion criteria. After being given an ethically approved Participant  
42  
43 413 Information Sheet (PIS), parents/caregivers will be given at least 48 hours to consider  
44  
45 414 participation, unless they are happy to give informed consent before this time. It is anticipated  
46  
47 415 that the children eligible for the study will be too young and/or too ill to participate directly in  
48  
49 416 the consent process. Each parent/caregiver will complete a contact form that will record the  
50  
51  
52  
53  
54  
55  
56  
57  
58  
59  
60

1  
2  
3 417 information needed for the follow-up survey distribution (e.g. mail addresses, telephone  
4  
5 418 numbers) and informed consent will be obtained to allow the sharing of this personal data.  
6

7  
8 419 **Researching sensitive and emotive topics**  
9

10  
11 420 It is recognised that parents/caregivers of previously healthy young children who have  
12  
13 421 survived critical illness may have psychological sequelae (i.e. post-traumatic stress disorder)  
14  
15 422 following their child's admission to PICU,(38). Although not specifically asking about their PICU  
16  
17 423 experience, completing the survey and taking part in the interviews may raise potentially  
18  
19 424 distressing issues around difficult feeding and/or mealtime behaviours following the PICU  
20  
21 425 admission. Initial instances of distress will be dealt by the researcher and supported by the PICU  
22  
23 426 psychology team at the researchers host institution. The researcher will also signpost the  
24  
25 427 participants to the Patient Advice and Liaison Services (PALS), clinical psychology team based at  
26  
27 428 Southampton Children's Hospital and other local healthcare teams.  
28  
29  
30

31  
32 429 **Burden**  
33

34  
35 430 The survey is compiled of four separate pre-existing validated questionnaires, asked at  
36  
37 431 four separate timepoints during the enrolment and follow-up (at recruitment, at 1, 3 and 6  
38  
39 432 months after PICU discharge). The questionnaires include Likert scales, yes/no answers and  
40  
41 433 drop-down options. The survey questions and instructions have been piloted by parents of  
42  
43 434 young children, assessing the clarity of the questionnaires, the instructions and consideration of  
44  
45 435 the time and mental burden in completing all four questionnaires. Average time for survey  
46  
47 436 completion was 15 minutes, with follow-up surveys thought to be quicker. We endeavour to  
48  
49 437 reduce this burden by having the option of an online electronic survey available to parents and  
50  
51 438 by adding the feature where you can 'save and go back to later' option within the survey. The  
52  
53 439 PIS will clearly state that there will be no financial gain from taking part in the study. Conversely,  
54  
55  
56  
57  
58  
59  
60

1  
2  
3 440 some participants might find taking part in the study beneficial because they will have the time  
4  
5 441 and space to think about issues which are important to them.  
6

#### 7 442 **Ethical review**

8  
9  
10 443 The Yorkshire and The Humber – South Yorkshire Research Ethics Committee has  
11  
12 444 reviewed the study protocol and provided favourable opinion (Ref: 20/YH/0160). The Health  
13  
14 445 Research Authority has also approved the protocol (IRAS: 279171). This study has been  
15  
16 446 extensively peer reviewed through the University of Southampton and forms the PhD study of  
17  
18 447 the first author.  
19  
20

21 448

#### 22 23 449 **Methods of dissemination**

24  
25 450 This paper is part of the dissemination plan of the PIES study, by presenting the project  
26  
27 451 background, providing a detailed description of methods and procedures used to collect and  
28  
29 452 analyse the data. Other dissemination plans involve local, national and international audiences  
30  
31 453 including academics, health care professionals, healthcare commissioners, charities and the  
32  
33 454 public. Dissemination will include written and oral feedback to the PPI group, local PICU charity  
34  
35 455 and each recruitment centre. Presentations to local and national research and clinical teams will  
36  
37 456 take place, including research meetings and conferences. The findings from this study will  
38  
39 457 contribute to addressing the significant gaps in the literature by investigating the prevalence of  
40  
41 458 and predictors for feeding difficulties experienced by previously healthy young children who  
42  
43 459 survive critical illness and explore the effect on parental feeding experiences, behaviours and  
44  
45 460 stress. It is anticipated that the expected outputs of this proposed project will be in terms of  
46  
47 461 high quality, peer-reviewed scientific publications and conference presentations. During the  
48  
49 462 informed consent process, parents/caregivers will be asked if they would like a lay summary of  
50  
51 463 any study findings sent to them at the end of the study.  
52  
53  
54  
55  
56  
57  
58  
59  
60

464 **References**

- 465 1. Kanthimathinathan HK, Plunkett A, Scholefield BR, Pearson GA, Morris KP.  
466 Trends in long-stay admissions to a UK paediatric intensive care unit. Archives of disease  
467 in childhood. 2019.
- 468 2. Davis P, Stutchfield C, Evans TA, Draper E. Increasing admissions to paediatric  
469 intensive care units in England and Wales: more than just rising a birth rate. Archives of  
470 disease in childhood. 2018;103(4):341-5.
- 471 3. Colville G, Pierce C. Patterns of post-traumatic stress symptoms in families after  
472 paediatric intensive care. Intensive Care Med. 2012;38(9):1523-31.
- 473 4. (PICANET) PICAN. Annual Report 2017/2017 27 May 2018. Available from:  
474 [http://www.picanet.org.uk/Audit/Annual-](http://www.picanet.org.uk/Audit/Annual-Reporting/PICANet_2017_Annual_Report_Summary_v1.0_FINAL.pdf)  
475 [Reporting/PICANet 2017 Annual Report Summary v1.0 FINAL.pdf](http://www.picanet.org.uk/Audit/Annual-Reporting/PICANet_2017_Annual_Report_Summary_v1.0_FINAL.pdf).
- 476 5. Ruhl A, Lord, RK, Panek JA et al. Health care resource use and costs of two-year  
477 survivors of acute lung injury: an observational cohort study. Annals of the American  
478 Thoracic Society. 2015;12(3):392 - 401.
- 479 6. Manning JC, Hemingway P, Redsell SA. Survived so what? Identifying priorities  
480 for research with children and families post-paediatric intensive care unit. Nursing in  
481 critical care. 2018;23(2):68-74.
- 482 7. Rennie JE, Johnston CC, Dougherty G, Platt R, Ritchie JA. Children's  
483 psychological responses after critical illness and exposure to invasive technology. J Dev  
484 Behav Pediatr. 2002;23(3):133-44.
- 485 8. Leder SB. Incidence and type of aspiration in acute care patients requiring  
486 mechanical ventilation via a new tracheotomy. Chest. 2002;122(5):1721-6.
- 487 9. Tolep K, Getch CL, Criner GJ. Swallowing dysfunction in patients receiving  
488 prolonged mechanical ventilation. Chest. 1996;109(1):167-72.
- 489 10. Skoretz SA, Flowers HL, Martino R. The incidence of dysphagia following  
490 endotracheal intubation: a systematic review. Chest. 2010;137(3):665-73.
- 491 11. Macht M, Wimbish T, Clark BJ, Benson AB, Burnham EL, Williams A, et al.  
492 Postextubation dysphagia is persistent and associated with poor outcomes in survivors of  
493 critical illness. Crit Care. 2011;15(5):R231.
- 494 12. Merriweather JL, Salisbury LG, Walsh TS, Smith P. Nutritional care after critical  
495 illness: a qualitative study of patients' experiences. Journal of human nutrition and  
496 dietetics : the official journal of the British Dietetic Association. 2016;29(2):127-36.
- 497 13. Merriweather J, Smith P, Walsh T. Nutritional rehabilitation after ICU - does it  
498 happen: a qualitative interview and observational study. Journal of clinical nursing.  
499 2014;23(5-6):654-62.
- 500 14. Briassoulis GC, Zavras NJ, Hatzis MT. Effectiveness and safety of a protocol for  
501 promotion of early intragastric feeding in critically ill children. Pediatr Crit Care Med.  
502 2001;2(2):113-21.
- 503 15. Meyer R, Harrison S, Sargent S, Ramnarayan P, Habibi P, Labadarios D. The  
504 impact of enteral feeding protocols on nutritional support in critically ill children. J Hum  
505 Nutr Diet. 2009;22(5):428-36.
- 506 16. Mehta NM, Skillman HE, Irving SY, Coss-Bu JA, Vermilyea S, Farrington EA, et  
507 al. Guidelines for the Provision and Assessment of Nutrition Support Therapy in the  
508 Pediatric Critically Ill Patient: Society of Critical Care Medicine and American Society  
509 for Parenteral and Enteral Nutrition. Pediatr Crit Care Med. 2017;18(7):675-715.

- 1  
2  
3 510 17. Tregay J, Wray J, Crowe S, Knowles R, Daubeney P, Franklin R, et al. Going  
4 511 home after infant cardiac surgery: a UK qualitative study. *Arch Dis Child*.  
5 512 2016;101(4):320-5.
- 6 513 18. Powell-Tuck J. Nutritional interventions in critical illness. *Proc Nutr Soc*.  
7 514 2007;66(1):16-24.
- 8 515 19. Senez C, Guys JM, Mancini J, Paz Paredes A, Lena G, Choux M. Weaning  
9 516 children from tube to oral feeding. *Childs Nerv Syst*. 1996;12(10):590-4.
- 10 517 20. Dello Strologo L, Principato F, Sinibaldi D, Appiani AC, Terzi F, Dartois AM, et  
11 518 al. Feeding dysfunction in infants with severe chronic renal failure after long-term  
12 519 nasogastric tube feeding. *Pediatric nephrology (Berlin, Germany)*. 1997;11(1):84-6.
- 13 520 21. Thoyre SM. Developmental transition from gavage to oral feeding in the preterm  
14 521 infant. *Annu Rev Nurs Res*. 2003;21:61-92.
- 15 522 22. Savage JS, Fisher JO, Birch LL. Parental influence on eating behavior: conception  
16 523 to adolescence. *J Law Med Ethics*. 2007;35(1):22-34.
- 17 524 23. Lutz KF. Feeding Problems of NICU and PICU Graduates: Perceptions of Parents  
18 525 and Providers. *Newborn and infant nursing reviews : NAINR*. 2012;12(4):207-13.
- 19 526 24. Long KA, Marsland AL. Family adjustment to childhood cancer: a systematic  
20 527 review. *Clin Child Fam Psychol Rev*. 2011;14(1):57-88.
- 21 528 25. Morton K, Marino, L.V., Pappachan, J.V., Darlington, A.S. Feeding difficulties in  
22 529 young paediatric intensive care survivors: A scoping review. *Clinical Nutrition ESPEN*.  
23 530 2019.
- 24 531 26. Plano-Clark C. *Designing and Conducting Mixed Methods Research*. 2nd ed:  
25 532 SAGE publishing; 2011.
- 26 533 27. Health Do. *Research governance framework for health and social care*. In: Health  
27 534 Do, editor. London: DoH; 2005.
- 28 535 28. Story M, Holt, K., Sofka, D., *Bright Futures in Clinical Practice*. Nutrition,  
29 536 Rockville, MD.: National Center for Education in Maternal and Child Health.; 2002.
- 30 537 29. Wickenden M. The development and disruption of feeding skills in babies and  
31 538 young children. . In: Southall A, Martin, Clarrissa, editor. *Feeding problems in children:  
32 539 a practical guide (2nd Edition)*. Oxford: Radcliffe Publishing; 2011.
- 33 540 30. Spagnola M. FBH. Family routines and rituals: A context for development in the  
34 541 lives of young children. *Infants & Young Children*. 2007;20:284-99.
- 35 542 31. Hawdon JM, Beauregard N, Slattery J, Kennedy G. Identification of neonates at  
36 543 risk of developing feeding problems in infancy. *Dev Med Child Neurol*. 2000;42(4):235-  
37 544 9.
- 38 545 32. Einarson KD, Arthur HM. Predictors of oral feeding difficulty in cardiac surgical  
39 546 infants. *Pediatric nursing*. 2003;29(4):315-9.
- 40 547 33. Kogon BE, Ramaswamy V, Todd K, Plattner C, Kirshbom PM, Kanter KR, et al.  
41 548 Feeding difficulty in newborns following congenital heart surgery. *Congenital heart  
42 549 disease*. 2007;2(5):332-7.
- 43 550 34. Jadcherla SR, Vijayapal AS, Leuthner S. Feeding abilities in neonates with  
44 551 congenital heart disease: a retrospective study. *J Perinatol*. 2009;29(2):112-8.
- 45 552 35. Indramohan G, Pedigo TP, Rostoker N, Cambare M, Grogan T, Federman MD.  
46 553 Identification of Risk Factors for Poor Feeding in Infants with Congenital Heart Disease  
47 554 and a Novel Approach to Improve Oral Feeding. *Journal of pediatric nursing*.  
48 555 2017;35:149-54.



- 1  
2  
3 556 36. Smeeth L, Fletcher AE. Improving the response rates to questionnaires. *Bmj*.  
4 557 2002;324(7347):1168-9.
- 5 558 37. Pulham RA, Wray J, Feinstein Y, Brown K, Pierce C, Nadel S, et al. Feasibility  
6 559 and Acceptability of Methods to Collect Follow-Up Information From Parents 12 Months  
7 560 After Their Child's Emergency Admission to Pediatric Intensive Care. *Pediatric critical  
8 561 care medicine : a journal of the Society of Critical Care Medicine and the World  
9 562 Federation of Pediatric Intensive and Critical Care Societies*. 2019;20(4):e199-e207.
- 10 563 38. Shudy M, de Almeida ML, Ly S, Landon C, Groft S, Jenkins TL, et al. Impact of  
11 564 pediatric critical illness and injury on families: a systematic literature review. *Pediatrics*.  
12 565 2006;118 Suppl 3:S203-18.
- 13 566 39. Wickenden M. The development and disruption of feeding skills in babies and  
14 567 young children. In: Southall A, Martin, Clarrissa, editor. *Feeding problems in children; a  
15 568 practical guide*. 2nd ed. Oxford: Radcliffe Publishings; 2011. p. 2 - 28.
- 16 569 40. Wright CM, Parkinson KN, Drewett RF. How does maternal and child feeding  
17 570 behavior relate to weight gain and failure to thrive? Data from a prospective birth cohort.  
18 571 *Pediatrics*. 2006;117(4):1262-9.
- 19 572 41. Crist W MP, Beck M, Gillespie C, Barrett P, Matthews J. Behavior at mealtimes  
20 573 and the young child with cystic fibrosis. *Journal of Developmental Behavior in  
21 574 Pediatrics*. 1994;15:157 - 61.
- 22 575 42. Berry J, Jones, WH. The Parental Stress Scale: initial psychometric evidence.  
23 576 *Journal of Social and Personal Relationships*. 1995;12:463 - 72.
- 24 577 43. Baughcum AE, Powers SW, Johnson SB, Chamberlin LA, Deeks CM, Jain A, et  
25 578 al. Maternal feeding practices and beliefs and their relationships to overweight in early  
26 579 childhood. *J Dev Behav Pediatr*. 2001;22(6):391-408.
- 27 580 44. Birch LL, Fisher JO, Grimm-Thomas K, Markey CN, Sawyer R, Johnson SL.  
28 581 Confirmatory factor analysis of the Child Feeding Questionnaire: a measure of parental  
29 582 attitudes, beliefs and practices about child feeding and obesity proneness. *Appetite*.  
30 583 2001;36(3):201-10.
- 31 584 45. Putnam SP, Helbig AL, Gartstein MA, Rothbart MK, Leerkes E. Development  
32 585 and assessment of short and very short forms of the infant behavior questionnaire-  
33 586 revised. *J Pers Assess*. 2014;96(4):445-58.
- 34 587 46. Putnam SP, Rothbart MK. Development of short and very short forms of the  
35 588 Children's Behavior Questionnaire. *J Pers Assess*. 2006;87(1):102-12.
- 36 589 47. Mays NP, C. *Qualitative Research in Health Care*. London: BMJ Publishing  
37 590 Group; 1996.
- 38 591 48. Clandinin DJ CF. *Narrative Inquiry; Experience and Story in Qualitative  
39 592 Research*. San Francisco CA: Jossey-Bass; 2000.
- 40 593 49. Haydon G, Browne, G and van der Riet, P. Narrative inquiry as a research  
41 594 methodology exploring personcentred care in nursing. . *Collegian*. 2018;25:125 - 9.
- 42 595 50. Braun VaC, V. Using thematic analysis in psychology. *Qualitative Research in  
43 596 Psychology*. 2006;3(2):77-101.
- 44 597 51. Holloway IaW, S. . *Qualitative Research in Nursing and Healthcare (3rd Edition)*.  
45 598 . Oxford: Wiley-Blackwell; 2010.
- 46 599 52. Polit DaB, CT. *Essentials of Nursing Reseach: Appraising evidence for nursing  
47 600 practice (9th Edition)*. Philadelphia: Wolters Kluwer; 2017.

1  
2  
3 601 53. INVOLVE. Briefing notes for researchers: involving the public in NHS, public  
4 602 health and social care research. In: INVOLVE, editor. Eastleigh: INVOLVE; 2012.  
5 603  
6  
7

8 604 **Acknowledgements**

9  
10 605 The PIES study protocol was developed by KM, LVM and ASD. The corresponding author would  
11  
12 606 like to acknowledge LVM and ASD in their supervisory support during KM's PhD in which The  
13  
14 607 PIES Study has been developed. KM would like to acknowledge the University of Southampton  
15  
16 608 and University Hospital Southampton NHS Foundation Trust in supporting and funding her PhD  
17  
18 609 through the Wessex Clinical Doctoral Research Fellowship scheme, and the clinical team at  
19  
20 610 Southampton Children's Hospital PICU in allowing KM the clinical backfill time to undertake her  
21  
22 611 PhD. Furthermore, KM would like to acknowledge Kevin Wheeler (Clinical Informatics Research  
23  
24 612 Unit, Southampton) for his support and patience in developing the PIES study data capture and  
25  
26 613 management through the ALEA database/eCRF.  
27  
28  
29

30 614  
31  
32 615 **Conflict of interest**

33  
34 616 None declared  
35  
36  
37 617

38  
39 618 **Statement of authorship**

40  
41 619 Authors made the following contribution to the manuscript:

- 42  
43 620 (1) KM formulated the original research idea, conducted the literature searching and is the  
44  
45 621 chief investigator for the study,  
46  
47 622 (2) KM drafted the manuscript from the ethically approved protocol (which was originally  
48  
49 623 supported by LVM and ASD)  
50  
51 624 (3) LVM, ASD and KM reviewed and revised the manuscript for important intellectual  
52  
53 625 content, and (4) all authors provided final approval of the version to be submitted.  
54  
55  
56  
57  
58  
59  
60



1  
2  
3 626  
4

5 627 **Data Statement**  
6

7 628 Technical appendix, statistical code, and dataset for The PIES study will be available from the  
8

9  
10 629 University of Southampton Institutional Research Repository, ePrints Soton  
11

12 630 (<https://eprints.soton.ac.uk/>)  
13

14 631  
15

16  
17 632 **Funding**  
18

19 633 This report describes independent research arising from a personal Clinical Doctoral Research  
20

21 634 Fellowship for Kathryn Morton, supported jointly by the University of Southampton and  
22

23 635 University Hospital Southampton NHS Foundation Trust, England.  
24

25  
26 636  
27

28 637 **Figure 1 for schematic overview of the study design**  
29  
30  
31  
32  
33  
34  
35  
36  
37  
38  
39  
40  
41  
42  
43  
44  
45  
46  
47  
48  
49  
50  
51  
52  
53  
54  
55  
56  
57  
58  
59  
60

1  
2  
3  
4  
5  
6  
7  
8  
9  
10  
11  
12  
13  
14  
15  
16  
17  
18  
19  
20  
21  
22  
23  
24  
25  
26  
27  
28  
29  
30  
31  
32  
33  
34  
35  
36  
37  
38  
39  
40  
41  
42  
43  
44  
45  
46  
47

638

For peer review only

1  
2  
3  
4  
5  
6  
7  
8  
9  
10  
11  
12  
13  
14  
15  
16  
17  
18  
19  
20  
21  
22  
23  
24  
25  
26  
27  
28  
29  
30  
31  
32  
33  
34  
35  
36  
37  
38  
39  
40  
41  
42  
43  
44  
45  
46  
47

1 **Figure 1: Overview of The PIES study design**

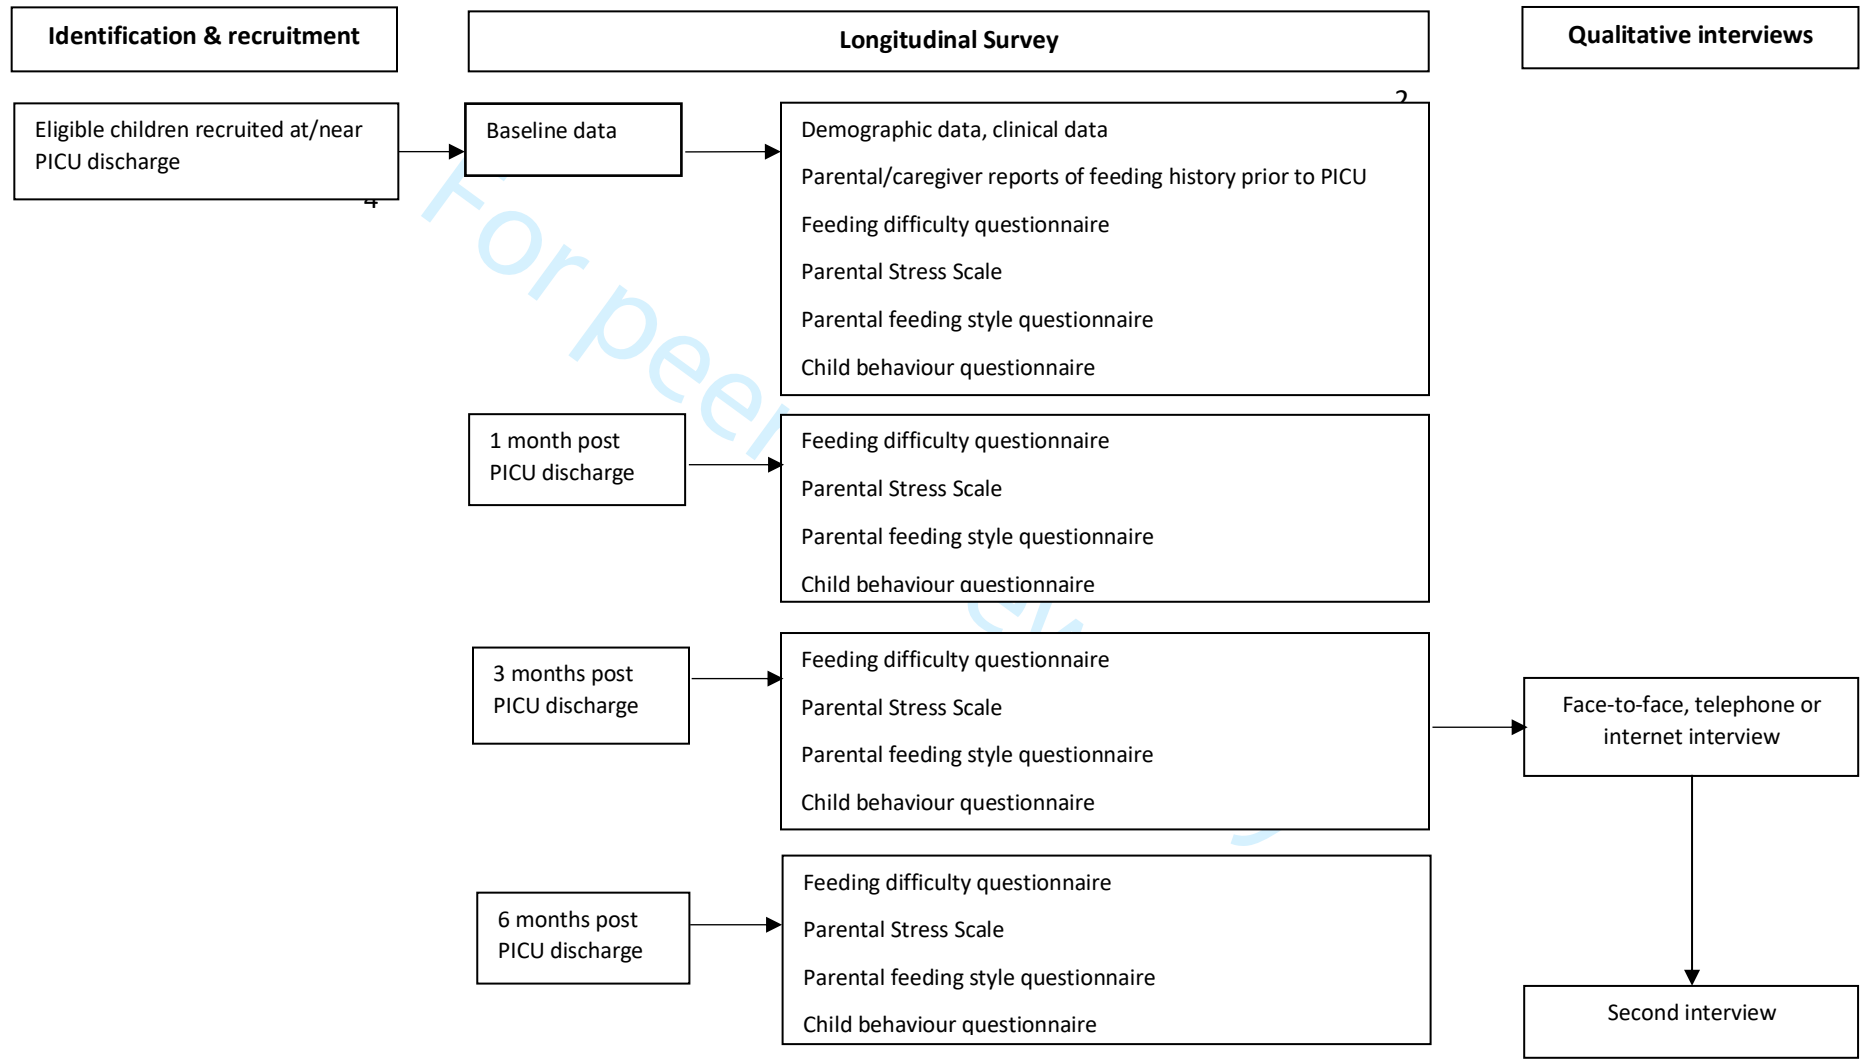

# Reporting checklist for protocol of a clinical trial.

Based on the SPIRIT guidelines.

## Instructions to authors

Complete this checklist by entering the page numbers from your manuscript where readers will find each of the items listed below.

Your article may not currently address all the items on the checklist. Please modify your text to include the missing information. If you are certain that an item does not apply, please write "n/a" and provide a short explanation.

Upload your completed checklist as an extra file when you submit to a journal.

In your methods section, say that you used the SPIRIT reporting guidelines, and cite them as:

Chan A-W, Tetzlaff JM, Altman DG, Laupacis A, Gøtzsche PC, Krleža-Jerić K, Hróbjartsson A, Mann H, Dickersin K, Berlin J, Doré C, Parulekar W, Summerskill W, Groves T, Schulz K, Sox H, Rockhold FW, Rennie D, Moher D. SPIRIT 2013 Statement: Defining standard protocol items for clinical trials. *Ann Intern Med.* 2013;158(3):200-207

|                                   |                                                                                                                                 |  | Page   |
|-----------------------------------|---------------------------------------------------------------------------------------------------------------------------------|--|--------|
|                                   | Reporting Item                                                                                                                  |  | Number |
| <b>Administrative information</b> |                                                                                                                                 |  |        |
| Title                             | <a href="#">#1</a> Descriptive title identifying the study design, population, interventions, and, if applicable, trial acronym |  | 1      |

|    |                     |                     |                                                            |          |
|----|---------------------|---------------------|------------------------------------------------------------|----------|
| 1  | Trial registration  | <a href="#">#2a</a> | Trial identifier and registry name. If not yet registered, | N/A      |
| 2  |                     |                     | name of intended registry                                  |          |
| 3  |                     |                     |                                                            |          |
| 4  |                     |                     |                                                            |          |
| 5  |                     |                     |                                                            |          |
| 6  | Trial registration: | <a href="#">#2b</a> | All items from the World Health Organization Trial         | NA       |
| 7  | data set            |                     | Registration Data Set                                      |          |
| 8  |                     |                     |                                                            |          |
| 9  |                     |                     |                                                            |          |
| 10 |                     |                     |                                                            |          |
| 11 | Protocol version    | <a href="#">#3</a>  | Date and version identifier                                | 3        |
| 12 |                     |                     |                                                            |          |
| 13 |                     |                     |                                                            |          |
| 14 |                     |                     |                                                            |          |
| 15 | Funding             | <a href="#">#4</a>  | Sources and types of financial, material, and other        | 27       |
| 16 |                     |                     | support                                                    |          |
| 17 |                     |                     |                                                            |          |
| 18 |                     |                     |                                                            |          |
| 19 |                     |                     |                                                            |          |
| 20 | Roles and           | <a href="#">#5a</a> | Names, affiliations, and roles of protocol contributors    | 1 and 25 |
| 21 | responsibilities:   |                     |                                                            |          |
| 22 |                     |                     |                                                            |          |
| 23 | contributorship     |                     |                                                            |          |
| 24 |                     |                     |                                                            |          |
| 25 |                     |                     |                                                            |          |
| 26 |                     |                     |                                                            |          |
| 27 |                     |                     |                                                            |          |
| 28 | Roles and           | <a href="#">#5b</a> | Name and contact information for the trial sponsor         | 27       |
| 29 | responsibilities:   |                     |                                                            |          |
| 30 |                     |                     |                                                            |          |
| 31 | sponsor contact     |                     |                                                            |          |
| 32 |                     |                     |                                                            |          |
| 33 | information         |                     |                                                            |          |
| 34 |                     |                     |                                                            |          |
| 35 |                     |                     |                                                            |          |
| 36 |                     |                     |                                                            |          |
| 37 |                     |                     |                                                            |          |
| 38 | Roles and           | <a href="#">#5c</a> | Role of study sponsor and funders, if any, in study        | N/A      |
| 39 | responsibilities:   |                     | design; collection, management, analysis, and              |          |
| 40 |                     |                     | interpretation of data; writing of the report; and the     |          |
| 41 | sponsor and funder  |                     | decision to submit the report for publication, including   |          |
| 42 |                     |                     | whether they will have ultimate authority over any of      |          |
| 43 |                     |                     | these activities                                           |          |
| 44 |                     |                     |                                                            |          |
| 45 |                     |                     |                                                            |          |
| 46 |                     |                     |                                                            |          |
| 47 |                     |                     |                                                            |          |
| 48 |                     |                     |                                                            |          |
| 49 |                     |                     |                                                            |          |
| 50 |                     |                     |                                                            |          |
| 51 |                     |                     |                                                            |          |
| 52 | Roles and           | <a href="#">#5d</a> | Composition, roles, and responsibilities of the            | N/A      |
| 53 | responsibilities:   |                     | coordinating centre, steering committee, endpoint          |          |
| 54 |                     |                     | adjudication committee, data management team, and          |          |
| 55 | committees          |                     |                                                            |          |
| 56 |                     |                     |                                                            |          |
| 57 |                     |                     |                                                            |          |
| 58 |                     |                     |                                                            |          |
| 59 |                     |                     |                                                            |          |
| 60 |                     |                     |                                                            |          |

1 other individuals or groups overseeing the trial, if  
 2  
 3 applicable (see Item 21a for data monitoring committee)  
 4  
 5

## 6 Introduction

9 Background and [#6a](#) Description of research question and justification for  
 10  
 11 rationale undertaking the trial, including summary of relevant  
 12  
 13 studies (published and unpublished) examining benefits  
 14  
 15 and harms for each intervention  
 16  
 17 From  
 18 page 4

19 Background and [#6b](#) Explanation for choice of comparators  
 20  
 21 rationale: choice of  
 22  
 23 comparators  
 24  
 25 N/A

26 Objectives [#7](#) Specific objectives or hypotheses  
 27  
 28 6

29 Trial design [#8](#) Description of trial design including type of trial (eg,  
 30  
 31 parallel group, crossover, factorial, single group),  
 32  
 33 allocation ratio, and framework (eg, superiority,  
 34  
 35 equivalence, non-inferiority, exploratory)  
 36  
 37 7  
 38

## 39 Methods:

41 Participants,  
 42  
 43 interventions, and  
 44  
 45 outcomes  
 46  
 47  
 48

49 Study setting [#9](#) Description of study settings (eg, community clinic,  
 50  
 51 academic hospital) and list of countries where data will  
 52  
 53 be collected. Reference to where list of study sites can  
 54  
 55 be obtained  
 56  
 57  
 58  
 59  
 60 7 and 10

|    |                      |                      |                                                              |     |
|----|----------------------|----------------------|--------------------------------------------------------------|-----|
| 1  | Eligibility criteria | <a href="#">#10</a>  | Inclusion and exclusion criteria for participants. If        | 11  |
| 2  |                      |                      | applicable, eligibility criteria for study centres and       |     |
| 3  |                      |                      | individuals who will perform the interventions (eg,          |     |
| 4  |                      |                      | surgeons, psychotherapists)                                  |     |
| 5  |                      |                      |                                                              |     |
| 6  |                      |                      |                                                              |     |
| 7  |                      |                      |                                                              |     |
| 8  |                      |                      |                                                              |     |
| 9  |                      |                      |                                                              |     |
| 10 |                      |                      |                                                              |     |
| 11 | Interventions:       | <a href="#">#11a</a> | Interventions for each group with sufficient detail to allow | N/A |
| 12 |                      |                      | replication, including how and when they will be             |     |
| 13 | description          |                      | administered                                                 |     |
| 14 |                      |                      |                                                              |     |
| 15 |                      |                      |                                                              |     |
| 16 |                      |                      |                                                              |     |
| 17 |                      |                      |                                                              |     |
| 18 |                      |                      |                                                              |     |
| 19 | Interventions:       | <a href="#">#11b</a> | Criteria for discontinuing or modifying allocated            | N/A |
| 20 |                      |                      | interventions for a given trial participant (eg, drug dose   |     |
| 21 | modifications        |                      | change in response to harms, participant request, or         |     |
| 22 |                      |                      | improving / worsening disease)                               |     |
| 23 |                      |                      |                                                              |     |
| 24 |                      |                      |                                                              |     |
| 25 |                      |                      |                                                              |     |
| 26 |                      |                      |                                                              |     |
| 27 |                      |                      |                                                              |     |
| 28 |                      |                      |                                                              |     |
| 29 | Interventions:       | <a href="#">#11c</a> | Strategies to improve adherence to intervention              | N/A |
| 30 |                      |                      | protocols, and any procedures for monitoring adherence       |     |
| 31 | adherence            |                      | (eg, drug tablet return; laboratory tests)                   |     |
| 32 |                      |                      |                                                              |     |
| 33 |                      |                      |                                                              |     |
| 34 |                      |                      |                                                              |     |
| 35 |                      |                      |                                                              |     |
| 36 | Interventions:       | <a href="#">#11d</a> | Relevant concomitant care and interventions that are         | N/A |
| 37 |                      |                      | permitted or prohibited during the trial                     |     |
| 38 | concomitant care     |                      |                                                              |     |
| 39 |                      |                      |                                                              |     |
| 40 |                      |                      |                                                              |     |
| 41 |                      |                      |                                                              |     |
| 42 | Outcomes             | <a href="#">#12</a>  | Primary, secondary, and other outcomes, including the        | 7   |
| 43 |                      |                      | specific measurement variable (eg, systolic blood            |     |
| 44 |                      |                      | pressure), analysis metric (eg, change from baseline,        |     |
| 45 |                      |                      | final value, time to event), method of aggregation (eg,      |     |
| 46 |                      |                      | median, proportion), and time point for each outcome.        |     |
| 47 |                      |                      |                                                              |     |
| 48 |                      |                      |                                                              |     |
| 49 |                      |                      |                                                              |     |
| 50 |                      |                      |                                                              |     |
| 51 |                      |                      |                                                              |     |
| 52 |                      |                      |                                                              |     |
| 53 |                      |                      | Explanation of the clinical relevance of chosen efficacy     |     |
| 54 |                      |                      | and harm outcomes is strongly recommended                    |     |
| 55 |                      |                      |                                                              |     |
| 56 |                      |                      |                                                              |     |
| 57 |                      |                      |                                                              |     |
| 58 |                      |                      |                                                              |     |
| 59 |                      |                      |                                                              |     |
| 60 |                      |                      |                                                              |     |

|    |                           |                      |                                                           |     |
|----|---------------------------|----------------------|-----------------------------------------------------------|-----|
| 1  | Participant timeline      | <a href="#">#13</a>  | Time schedule of enrolment, interventions (including any  | 8   |
| 2  |                           |                      | run-ins and washouts), assessments, and visits for        |     |
| 3  |                           |                      | participants. A schematic diagram is highly               |     |
| 4  |                           |                      | recommended (see Figure)                                  |     |
| 5  |                           |                      |                                                           |     |
| 6  |                           |                      |                                                           |     |
| 7  |                           |                      |                                                           |     |
| 8  |                           |                      |                                                           |     |
| 9  |                           |                      |                                                           |     |
| 10 |                           |                      |                                                           |     |
| 11 | Sample size               | <a href="#">#14</a>  | Estimated number of participants needed to achieve        | 12  |
| 12 |                           |                      | study objectives and how it was determined, including     |     |
| 13 |                           |                      | clinical and statistical assumptions supporting any       |     |
| 14 |                           |                      | sample size calculations                                  |     |
| 15 |                           |                      |                                                           |     |
| 16 |                           |                      |                                                           |     |
| 17 |                           |                      |                                                           |     |
| 18 |                           |                      |                                                           |     |
| 19 |                           |                      |                                                           |     |
| 20 |                           |                      |                                                           |     |
| 21 | Recruitment               | <a href="#">#15</a>  | Strategies for achieving adequate participant enrolment   | 14  |
| 22 |                           |                      | to reach target sample size                               |     |
| 23 |                           |                      |                                                           |     |
| 24 |                           |                      |                                                           |     |
| 25 |                           |                      |                                                           |     |
| 26 | <b>Methods:</b>           |                      |                                                           |     |
| 27 |                           |                      |                                                           |     |
| 28 | <b>Assignment of</b>      |                      |                                                           |     |
| 29 | <b>interventions (for</b> |                      |                                                           |     |
| 30 | <b>controlled trials)</b> |                      |                                                           |     |
| 31 |                           |                      |                                                           |     |
| 32 |                           |                      |                                                           |     |
| 33 |                           |                      |                                                           |     |
| 34 |                           |                      |                                                           |     |
| 35 |                           |                      |                                                           |     |
| 36 | Allocation: sequence      | <a href="#">#16a</a> | Method of generating the allocation sequence (eg,         | N/A |
| 37 | generation                |                      | computer-generated random numbers), and list of any       |     |
| 38 |                           |                      | factors for stratification. To reduce predictability of a |     |
| 39 |                           |                      | random sequence, details of any planned restriction (eg,  |     |
| 40 |                           |                      | blocking) should be provided in a separate document that  |     |
| 41 |                           |                      | is unavailable to those who enrol participants or assign  |     |
| 42 |                           |                      | interventions                                             |     |
| 43 |                           |                      |                                                           |     |
| 44 |                           |                      |                                                           |     |
| 45 |                           |                      |                                                           |     |
| 46 |                           |                      |                                                           |     |
| 47 |                           |                      |                                                           |     |
| 48 |                           |                      |                                                           |     |
| 49 |                           |                      |                                                           |     |
| 50 |                           |                      |                                                           |     |
| 51 |                           |                      |                                                           |     |
| 52 |                           |                      |                                                           |     |
| 53 | Allocation                | <a href="#">#16b</a> | Mechanism of implementing the allocation sequence (eg,    | N/A |
| 54 | concealment               |                      | central telephone; sequentially numbered, opaque,         |     |
| 55 |                           |                      |                                                           |     |
| 56 |                           |                      |                                                           |     |
| 57 |                           |                      |                                                           |     |
| 58 | mechanism                 |                      |                                                           |     |
| 59 |                           |                      |                                                           |     |
| 60 |                           |                      |                                                           |     |



sealed envelopes), describing any steps to conceal the sequence until interventions are assigned

Allocation: [#16c](#) Who will generate the allocation sequence, who will enrol participants, and who will assign participants to interventions N/A

Blinding (masking) [#17a](#) Who will be blinded after assignment to interventions (eg, trial participants, care providers, outcome assessors, data analysts), and how N/A

Blinding (masking): [#17b](#) If blinded, circumstances under which unblinding is permissible, and procedure for revealing a participant's allocated intervention during the trial N/A

**Methods: Data collection, management, and analysis**

Data collection plan [#18a](#) Plans for assessment and collection of outcome, baseline, and other trial data, including any related processes to promote data quality (eg, duplicate measurements, training of assessors) and a description of study instruments (eg, questionnaires, laboratory tests) along with their reliability and validity, if known. Reference to where data collection forms can be found, if not in the protocol 15

|    |                            |                      |                                                             |         |
|----|----------------------------|----------------------|-------------------------------------------------------------|---------|
| 1  | Data collection plan:      | <a href="#">#18b</a> | Plans to promote participant retention and complete         | 15      |
| 2  |                            |                      |                                                             |         |
| 3  | retention                  |                      | follow-up, including list of any outcome data to be         |         |
| 4  |                            |                      | collected for participants who discontinue or deviate from  |         |
| 5  |                            |                      | intervention protocols                                      |         |
| 6  |                            |                      |                                                             |         |
| 7  |                            |                      |                                                             |         |
| 8  |                            |                      |                                                             |         |
| 9  |                            |                      |                                                             |         |
| 10 |                            |                      |                                                             |         |
| 11 | Data management            | <a href="#">#19</a>  | Plans for data entry, coding, security, and storage,        | N/A     |
| 12 |                            |                      | including any related processes to promote data quality     |         |
| 13 |                            |                      | (eg, double data entry; range checks for data values).      |         |
| 14 |                            |                      | Reference to where details of data management               |         |
| 15 |                            |                      | procedures can be found, if not in the protocol             |         |
| 16 |                            |                      |                                                             |         |
| 17 |                            |                      |                                                             |         |
| 18 |                            |                      |                                                             |         |
| 19 |                            |                      |                                                             |         |
| 20 |                            |                      |                                                             |         |
| 21 |                            |                      |                                                             |         |
| 22 |                            |                      |                                                             |         |
| 23 | Statistics: outcomes       | <a href="#">#20a</a> | Statistical methods for analysing primary and secondary     | 15      |
| 24 |                            |                      | outcomes. Reference to where other details of the           | onwards |
| 25 |                            |                      | statistical analysis plan can be found, if not in the       |         |
| 26 |                            |                      | protocol                                                    |         |
| 27 |                            |                      |                                                             |         |
| 28 |                            |                      |                                                             |         |
| 29 |                            |                      |                                                             |         |
| 30 |                            |                      |                                                             |         |
| 31 |                            |                      |                                                             |         |
| 32 |                            |                      |                                                             |         |
| 33 | Statistics: additional     | <a href="#">#20b</a> | Methods for any additional analyses (eg, subgroup and       | 15      |
| 34 | analyses                   |                      | adjusted analyses)                                          | onwards |
| 35 |                            |                      |                                                             |         |
| 36 |                            |                      |                                                             |         |
| 37 |                            |                      |                                                             |         |
| 38 |                            |                      |                                                             |         |
| 39 | Statistics: analysis       | <a href="#">#20c</a> | Definition of analysis population relating to protocol non- | 15      |
| 40 | population and             |                      | adherence (eg, as randomised analysis), and any             |         |
| 41 | missing data               |                      | statistical methods to handle missing data (eg, multiple    |         |
| 42 |                            |                      | imputation)                                                 |         |
| 43 |                            |                      |                                                             |         |
| 44 |                            |                      |                                                             |         |
| 45 |                            |                      |                                                             |         |
| 46 |                            |                      |                                                             |         |
| 47 |                            |                      |                                                             |         |
| 48 | <b>Methods: Monitoring</b> |                      |                                                             |         |
| 49 |                            |                      |                                                             |         |
| 50 |                            |                      |                                                             |         |
| 51 | Data monitoring:           | <a href="#">#21a</a> | Composition of data monitoring committee (DMC);             | N/A     |
| 52 | formal committee           |                      | summary of its role and reporting structure; statement of   |         |
| 53 |                            |                      | whether it is independent from the sponsor and              |         |
| 54 |                            |                      |                                                             |         |
| 55 |                            |                      |                                                             |         |
| 56 |                            |                      |                                                             |         |
| 57 |                            |                      |                                                             |         |
| 58 |                            |                      |                                                             |         |
| 59 |                            |                      |                                                             |         |
| 60 |                            |                      |                                                             |         |

1 competing interests; and reference to where further  
 2 details about its charter can be found, if not in the  
 3 protocol. Alternatively, an explanation of why a DMC is  
 4 not needed  
 5  
 6  
 7  
 8  
 9

|    |                      |                      |                                                              |     |
|----|----------------------|----------------------|--------------------------------------------------------------|-----|
| 10 | Data monitoring:     | <a href="#">#21b</a> | Description of any interim analyses and stopping             | N/A |
| 11 | interim analysis     |                      | guidelines, including who will have access to these          |     |
| 12 |                      |                      | interim results and make the final decision to terminate     |     |
| 13 |                      |                      | the trial                                                    |     |
| 14 |                      |                      |                                                              |     |
| 15 |                      |                      |                                                              |     |
| 16 |                      |                      |                                                              |     |
| 17 |                      |                      |                                                              |     |
| 18 |                      |                      |                                                              |     |
| 19 |                      |                      |                                                              |     |
| 20 | Harms                | <a href="#">#22</a>  | Plans for collecting, assessing, reporting, and managing     | No  |
| 21 |                      |                      | solicited and spontaneously reported adverse events and      |     |
| 22 |                      |                      | other unintended effects of trial interventions or trial     |     |
| 23 |                      |                      | conduct                                                      |     |
| 24 |                      |                      |                                                              |     |
| 25 |                      |                      |                                                              |     |
| 26 |                      |                      |                                                              |     |
| 27 |                      |                      |                                                              |     |
| 28 |                      |                      |                                                              |     |
| 29 |                      |                      |                                                              |     |
| 30 | Auditing             | <a href="#">#23</a>  | Frequency and procedures for auditing trial conduct, if      | No  |
| 31 |                      |                      | any, and whether the process will be independent from        |     |
| 32 |                      |                      | investigators and the sponsor                                |     |
| 33 |                      |                      |                                                              |     |
| 34 |                      |                      |                                                              |     |
| 35 |                      |                      |                                                              |     |
| 36 |                      |                      |                                                              |     |
| 37 |                      |                      |                                                              |     |
| 38 | <b>Ethics and</b>    |                      |                                                              |     |
| 39 | <b>dissemination</b> |                      |                                                              |     |
| 40 |                      |                      |                                                              |     |
| 41 |                      |                      |                                                              |     |
| 42 |                      |                      |                                                              |     |
| 43 | Research ethics      | <a href="#">#24</a>  | Plans for seeking research ethics committee / institutional  | 21  |
| 44 | approval             |                      | review board (REC / IRB) approval                            |     |
| 45 |                      |                      |                                                              |     |
| 46 |                      |                      |                                                              |     |
| 47 |                      |                      |                                                              |     |
| 48 | Protocol             | <a href="#">#25</a>  | Plans for communicating important protocol modifications     | 21  |
| 49 | amendments           |                      | (eg, changes to eligibility criteria, outcomes, analyses) to |     |
| 50 |                      |                      | relevant parties (eg, investigators, REC / IRBs, trial       |     |
| 51 |                      |                      | participants, trial registries, journals, regulators)        |     |
| 52 |                      |                      |                                                              |     |
| 53 |                      |                      |                                                              |     |
| 54 |                      |                      |                                                              |     |
| 55 |                      |                      |                                                              |     |
| 56 |                      |                      |                                                              |     |
| 57 |                      |                      |                                                              |     |
| 58 |                      |                      |                                                              |     |
| 59 |                      |                      |                                                              |     |
| 60 |                      |                      |                                                              |     |

|    |                       |                      |                                                                |        |
|----|-----------------------|----------------------|----------------------------------------------------------------|--------|
| 1  | Consent or assent     | <a href="#">#26a</a> | Who will obtain informed consent or assent from potential      | 14 and |
| 2  |                       |                      | trial participants or authorised surrogates, and how (see      | 19     |
| 3  |                       |                      | Item 32)                                                       |        |
| 4  |                       |                      |                                                                |        |
| 5  |                       |                      |                                                                |        |
| 6  |                       |                      |                                                                |        |
| 7  |                       |                      |                                                                |        |
| 8  |                       |                      |                                                                |        |
| 9  | Consent or assent:    | <a href="#">#26b</a> | Additional consent provisions for collection and use of        | N/A    |
| 10 | ancillary studies     |                      | participant data and biological specimens in ancillary         |        |
| 11 |                       |                      | studies, if applicable                                         |        |
| 12 |                       |                      |                                                                |        |
| 13 |                       |                      |                                                                |        |
| 14 |                       |                      |                                                                |        |
| 15 |                       |                      |                                                                |        |
| 16 | Confidentiality       | <a href="#">#27</a>  | How personal information about potential and enrolled          | 14/15  |
| 17 |                       |                      | participants will be collected, shared, and maintained in      |        |
| 18 |                       |                      | order to protect confidentiality before, during, and after     |        |
| 19 |                       |                      | the trial                                                      |        |
| 20 |                       |                      |                                                                |        |
| 21 |                       |                      |                                                                |        |
| 22 |                       |                      |                                                                |        |
| 23 |                       |                      |                                                                |        |
| 24 |                       |                      |                                                                |        |
| 25 |                       |                      |                                                                |        |
| 26 | Declaration of        | <a href="#">#28</a>  | Financial and other competing interests for principal          | N/A    |
| 27 | interests             |                      | investigators for the overall trial and each study site        |        |
| 28 |                       |                      |                                                                |        |
| 29 |                       |                      |                                                                |        |
| 30 |                       |                      |                                                                |        |
| 31 | Data access           | <a href="#">#29</a>  | Statement of who will have access to the final trial           | 26     |
| 32 |                       |                      | dataset, and disclosure of contractual agreements that         |        |
| 33 |                       |                      | limit such access for investigators                            |        |
| 34 |                       |                      |                                                                |        |
| 35 |                       |                      |                                                                |        |
| 36 |                       |                      |                                                                |        |
| 37 |                       |                      |                                                                |        |
| 38 |                       |                      |                                                                |        |
| 39 | Ancillary and post    | <a href="#">#30</a>  | Provisions, if any, for ancillary and post-trial care, and for | N/A    |
| 40 | trial care            |                      | compensation to those who suffer harm from trial               |        |
| 41 |                       |                      | participation                                                  |        |
| 42 |                       |                      |                                                                |        |
| 43 |                       |                      |                                                                |        |
| 44 |                       |                      |                                                                |        |
| 45 |                       |                      |                                                                |        |
| 46 |                       |                      |                                                                |        |
| 47 | Dissemination policy: | <a href="#">#31a</a> | Plans for investigators and sponsor to communicate trial       | 21     |
| 48 | trial results         |                      | results to participants, healthcare professionals, the         |        |
| 49 |                       |                      | public, and other relevant groups (eg, via publication,        |        |
| 50 |                       |                      | reporting in results databases, or other data sharing          |        |
| 51 |                       |                      | arrangements), including any publication restrictions          |        |
| 52 |                       |                      |                                                                |        |
| 53 |                       |                      |                                                                |        |
| 54 |                       |                      |                                                                |        |
| 55 |                       |                      |                                                                |        |
| 56 |                       |                      |                                                                |        |
| 57 |                       |                      |                                                                |        |
| 58 |                       |                      |                                                                |        |
| 59 |                       |                      |                                                                |        |
| 60 |                       |                      |                                                                |        |

1 Dissemination policy: [#31b](#) Authorship eligibility guidelines and any intended use of N/A  
 2  
 3 authorship professional writers  
 4  
 5

6 Dissemination policy: [#31c](#) Plans, if any, for granting public access to the full N/A  
 7  
 8 reproducible protocol, participant-level dataset, and statistical code  
 9  
 10 research  
 11  
 12

## 13 Appendices

14  
 15  
 16  
 17 Informed consent [#32](#) Model consent form and other related documentation No  
 18  
 19 materials given to participants and authorised surrogates  
 20  
 21

22  
 23 Biological specimens [#33](#) Plans for collection, laboratory evaluation, and storage of N/A  
 24  
 25 biological specimens for genetic or molecular analysis in  
 26  
 27 the current trial and for future use in ancillary studies, if  
 28  
 29 applicable  
 30  
 31

32  
 33 None The SPIRIT checklist is distributed under the terms of the Creative Commons Attribution  
 34  
 35 License CC-BY-ND 3.0. This checklist can be completed online using <https://www.goodreports.org/>, a  
 36  
 37 tool made by the [EQUATOR Network](#) in collaboration with [Penelope.ai](#)  
 38  
 39  
 40  
 41  
 42  
 43  
 44  
 45  
 46  
 47  
 48  
 49  
 50  
 51  
 52  
 53  
 54  
 55  
 56  
 57  
 58  
 59  
 60
